# Supplementary material for: The state of health in Pakistan and its provinces and territories, 1990–2019: a systematic analysis for the Global Burden of Disease Study 2019
Source: PubMed Central journal article supplement — Lancet Glob Health. 2023 Jan 18;11(2):e229–43. doi: 10.1016/S2214-109X(22)00497-1 (PMC10009760; doi:10.1016/s2214-109x(22)00497-1), 2023-01-18
Supplement: mmc1.pdf [file mmc1.pdf]

# THE LANCET

## Global Health

### Supplementary appendix 1

This translation in Urdu was submitted by the authors and we reproduce it as supplied. It has not been peer reviewed. *The Lancet's* editorial processes have only been applied to the original in English, which should serve as reference for this manuscript.

اردو میں یہ ترجمہ مصنفین کے ذریعہ پیش کیا گیا تھا اور ہم اس کی بہو دوبارہ تخلیق کرتے ہیں۔ اس کا ہم مرتبہ ماہروں کے ذریعہ جائزہ نہیں لیا گیا ہے۔ لانسیت کے ادارتی عمل کا اطلاق صرف انگریزی کے اصل پر ہوا ہے، جو اس نسخے کے حوالہ کے طور پر کام کرے گا

Supplement to: GBD 2019 Pakistan Collaborators. The state of health in Pakistan and its provinces and territories, 1990–2019: a systematic analysis for the Global Burden of Disease Study 2019. *Lancet Glob Health* 2023; **11**: e229–43.

1990 سے 2019 تک پاکستان اور اس کے صوبوں اور علاقوں میں صحت کی حالت:

بیماریوں کے عالمی بوجھ کے لیے ایک جامع تجزیہ

2019

پاکستان کولیبیریٹرز 2019 GBD

خلاصہ (Summary)

پس منظر (Background)

صحت کے رجحانات کو سمجھنا قومی اور مقامی سطحوں پر بیماریوں کے بوجھ کا اندازہ لگانے، ان کے بارے میں پالیسی سازوں کو صحت کی پیشرفت جاننے اور اس کے بارے میں مجموعی کارکردگی کی نشاندہی کرنے میں مدد کرتا ہے۔ بیماریوں، حادثات اور ان کے خدشات کے عالمی بوجھ کا مطالعہ 2019 (2019 GBD) پاکستان کے لیے جامع تخمینہ فراہم کرتا ہے۔ 1990 سے صحت کے اشاریوں کا موازنہ کرنے کی یہ اسٹڈی پاکستان کی صحت کے نظام کو مضبوط کرنے، عدم مساوات کو کم کرنے، خواتین اور بچوں کی صحت کو بہتر بنانے، یونیورسل ہیلتھ کوریج (UHC) اور اقوام متحدہ کے پائیدار ترقی کے اہداف (SDGs) کو حاصل کرنے کی معلومات فراہم کرتا ہے۔

طریقہ (Methods)

اس اسٹڈی میں ہم نے مندرجہ ذیل اعداد و شمار سے استفادہ کیا: سوشل ڈیموگرافک انڈیکس، (SDI) ٹوٹل فرٹیلیٹی ریٹ (TFR) سپیسیفک ڈیٹھس (Cause-Specific Deaths)، ایئرز آف لائف لوسٹ (YLLs) ایئرز لودڈ وڈ ڈس ایبیلیٹی (YLDs) ایبیلیٹی ایڈجسٹڈ لائف ایئرز (DALYs) ہیلتھی لائف ایکسپیکٹنسی (HALE) اور 1990 سے 2019 تک پاکستان، اس کے چاروں صوبوں، آزاد کشمیر، گلگت بلتستان اور فاٹا میں اموات کے خدشات کی 286 وجوہات اور صحت پر غیر مہلک بیماریوں کے نقصان کی 369 وجوہات۔ پاکستان میں قومی اور ذیلی سطحوں پر تخمینہ لگانے کے لئے پاکستان کے مخصوص آبادیاتی اشاریوں کے لیے 68 لوکیشن-ایئرز کا ڈیٹا، پاکستان میں اموات کی وجوہات کے لیے 316 لوکیشن-ایئرز کا ڈیٹا، پاکستان میں غیر مہلک نتائج کے لیے 579 لوکیشن-ایئرز کا ڈیٹا، خصوصاً پاکستان میں خدشات کے عوامل کے لیے 296 لوکیشن-ایئرز کا ڈیٹا، اور پاکستان میں مخصوص کوواریٹس (Co-variates) کے لیے 3089 لوکیشن-ایئرز کا ڈیٹا۔

نتائج (Findings)

1990 میں پاکستان میں قومی سطح پر دونوں جنسوں کی متوقع عمر 1-61 سال (95% فیصد آن سرٹینٹی انٹرول 0-60 — 1-62) سے بڑھ کر 2019 میں 8-63 — 8-67) ہو گئی۔ تاہم یہ اضافہ تمام صوبوں اور وفاقی علاقوں میں یکساں نہیں تھا۔ پاکستان میں 1990 سے 2019 کے درمیان جنسوں کے درمیان ہیلتھی لائف ایکسپیکٹنسی (HALE) میں فرق کم ہوا، کیونکہ خواتین کی صحت مردوں کے مقابلے میں تیز رفتاری سے بہتر ہوئی۔

خواتین میں 1990 اور 2019 کے درمیان لائف ایکسپیکٹنسی میں 2 سے 8 فیصد (8-13 — 3-6) اضافہ ہوا، جب کہ مردوں کی لائف ایکسپیکٹنسی میں 6 سے 7 فیصد (8-11 — 5-3) کا اضافہ ہوا۔ 2019 میں نوزائیدہ بچوں کے امراض، اسکیمک ہارٹ ڈیزیز (IHD)، فالج، اسہال کی بیماریاں، اور چھاتی کے نچلے حصے میں انفیکشن جیسے عوامل قبل از وقت اموات کی بڑی وجہ تھے۔ 2019 میں قومی سطح پر زچہ بچہ کی غذائی قلت، فضائی آلودگی، ہائی سیسٹولک بلڈ پریشر، غذائی خطرات اور تمباکو کا استعمال تمام عمر کے لوگوں کی اموات اور DALYs کے خطرے کا باعث بننے والے اہم عناصر تھے۔

### تشریح ( Interpretation )

یہ اسٹڈی بتاتی ہے کہ 1990 سے پاکستان میں بیماریوں کے بوجھ کو کم کرنے میں پیش رفت ہوئی ہے، لیکن جغرافیائی، عمر اور جنسی فرق برقرار ہے۔ زندگیوں کو بچانے اور صحت کے اشاریے بہتر بنانے کے لیے صحت کے نظام میں مساوی سرمایہ کاری کے ساتھ ساتھ بہتر نتائج مہیا کرنے والی پالیسیوں اور پروگراموں کو ترجیح دینے کی ضرورت ہے۔ پاکستان کو کئی ملکی اور غیر ملکی چیلنجوں کا سامنا ہے مثلاً افغانستان میں طالبان کی اقتدار میں واپسی، سیاسی بحران، تباہ کن سیلاب، COVID-19 وباء جیسے عناصر ملک میں صحت اور ترقی کی سمت کا تعین کرنے میں اہم کردار ادا کریں گے۔

پاکستان کو متعدد بیماریوں کے بوجھ سے نمٹنا اور غیر متعدی بیماریوں کی بڑھتی ہوئی شرح کو روکنا ہوگا۔ ان شعبوں کو ترجیح دینے سے پاکستان کو یونیورسل ہیلتھ کوریج (UHC) حاصل کرنے، اس کے پائیدار ترقیاتی اہداف (SDGs) کو پورا کرنے اور صحت کے مجموعی نتائج کو بہتر بنانے کی صلاحیت میں اضافہ ہوگا۔

### فنانڈنگ (Funding)

بل اینڈ میلنڈا گیٹس فاؤنڈیشن
