# Supplementary material for: The state of health in Pakistan and its provinces and territories, 1990–2019: a systematic analysis for the Global Burden of Disease Study 2019
Source: PubMed Central journal article supplement — Lancet Glob Health. 2023 Jan 18;11(2):e229–43. doi: 10.1016/S2214-109X(22)00497-1 (PMC10009760; doi:10.1016/s2214-109x(22)00497-1), 2023-01-18
Supplement: mmc2.pdf [file mmc2.pdf]

# THE LANCET

## Global Health

### Supplementary appendix 2

This appendix formed part of the original submission and has been peer reviewed. We post it as supplied by the authors.

Supplement to: GBD 2019 Pakistan Collaborators. The state of health in Pakistan and its provinces and territories, 1990–2019: a systematic analysis for the Global Burden of Disease Study 2019. *Lancet Glob Health* 2023; **11**: e229–43.

## Supplementary appendix to “The state of health of Pakistan and its provinces and territories, 1990–2019: a systematic analysis for the Global Burden of Disease Study 2019”

This appendix provides supplemental information and more detailed results for “The state of health of Pakistan and its provinces and territories, 1990–2019: a systematic analysis for the Global Burden of Disease Study 2019.”

### Contents

|                                                                                                                                                      |           |
|------------------------------------------------------------------------------------------------------------------------------------------------------|-----------|
| <b>Section 1: Abbreviations .....</b>                                                                                                                | <b>2</b>  |
| <b>Section 2: GATHER compliance .....</b>                                                                                                            | <b>2</b>  |
| <b>Section 3: Pakistan subnational locations .....</b>                                                                                               | <b>2</b>  |
| <b>Section 4: Data sources.....</b>                                                                                                                  | <b>3</b>  |
| 4.1. Input data sources used in GBD 2019 national and subnational estimation of Pakistan .....                                                       | 3         |
| 4.2. Source counts by national and subnational administrative units .....                                                                            | 36        |
| <b>Section 5: Politics and governance .....</b>                                                                                                      | <b>37</b> |
| 5.1. Political chronology, 1990–2019 .....                                                                                                           | 37        |
| 5.2. Additional notes on the 18th amendment.....                                                                                                     | 38        |
| <b>Section 6: Appendix tables.....</b>                                                                                                               | <b>38</b> |
| Appendix Table 1: Life expectancy, HALE, and SDI for both sexes for Pakistan and comparator countries.....                                           | 38        |
| Appendix Table 2: Healthcare Access and Quality Index for Pakistan .....                                                                             | 39        |
| <b>Section 7: Appendix figures.....</b>                                                                                                              | <b>39</b> |
| Appendix Figure 1: Trends in communicable, maternal, neonatal, and nutritional causes for Khyber Pakhtunkhwa and Balochistan.....                    | 39        |
| Appendix Figure 2: Political map of Pakistan .....                                                                                                   | 40        |
| Appendix Figure 3: SDI values for Pakistan and seven subnational units, 1990–2019.....                                                               | 40        |
| Appendix Figure 4: Leading causes of all-age deaths for both sexes, 1990 to 2019.....                                                                | 41        |
| Appendix Figure 5: Leading causes of YLLs for all ages and both sexes, 1990 and 2019.....                                                            | 41        |
| Appendix Figure 6: Changes in YLDs for all ages and both sexes, 1990 and 2019.....                                                                   | 42        |
| Appendix Figure 7: Number of deaths and percentage of DALYs attributable to the leading risk factors for all ages and both sexes, 1990 and 2019..... | 43        |
| <b>Section 8: GATHER tables.....</b>                                                                                                                 | <b>44</b> |
| GATHER checklist .....                                                                                                                               | 44        |

## Section 1: Abbreviations

| <b>Abbreviation</b> | <b>Full phrase</b>                                                 |
|---------------------|--------------------------------------------------------------------|
| CODEm               | Cause of Death Ensemble modelling                                  |
| COPD                | chronic obstructive pulmonary disease                              |
| COVID-19            | coronavirus disease 2019                                           |
| DALY                | disability-adjusted life-years                                     |
| GATHER              | Guidelines for Accurate and Transparent Health Estimates Reporting |
| GBD                 | Global Burden of Diseases, Injuries, and Risk Factors Study        |
| HALE                | healthy life expectancy                                            |
| HAQ                 | Healthcare Access and Quality                                      |
| IHD                 | ischaemic heart disease                                            |
| IHME                | Institute for Health Metrics and Evaluation                        |
| LE                  | life expectancy                                                    |
| LMIC                | low- and middle-income countries                                   |
| SARS-CoV-2          | severe acute respiratory syndrome coronavirus 2                    |
| SDI                 | Socio-demographic Index                                            |
| SDG                 | Sustainable Development Goals                                      |
| SEV                 | summary exposure value                                             |
| SRS                 | sample registration survey                                         |
| TB                  | tuberculosis                                                       |
| UHC                 | universal health coverage                                          |
| U5M                 | under-5 mortality                                                  |
| UI                  | uncertainty interval                                               |
| WHO                 | World Health Organization                                          |
| YLD                 | years lived with disability                                        |
| YLL                 | years of life lost                                                 |

## Section 2: GATHER compliance

This study complies with GATHER recommendations. We have documented the steps in our analytical procedures and detailed the data sources used. See section 9 for the GATHER checklist. The GATHER recommendations can be found on the [GATHER website](#).

## Section 3: Pakistan subnational locations

Pakistan subnational locations and administrative units

| <b>Name</b>                 | <b>Capital</b> | <b>Designation</b> |
|-----------------------------|----------------|--------------------|
| Azad Jammu and Kashmir      | Muzaffarabad   | Territory          |
| Balochistan                 | Quetta         | Province           |
| Gilgit-Baltistan            | Gilgit         | Territory          |
| Islamabad Capital Territory | Islamabad      | Territory          |
| Khyber Pakhtunkhwa*         | Peshawar       | Province           |

|        |         |          |
|--------|---------|----------|
| Punjab | Lahore  | Province |
| Sindh  | Karachi | Province |

\*Formerly known as North-West Frontier Province (NWFP)

## Section 4: Data sources

### 4.1. Input data sources used in GBD 2019 national and subnational estimation of Pakistan

Further information on the data sources utilised for this study can be found within the Global Health Data Exchange (GHDx) via the Data Input Sources tool, accessible here:

<http://ghdx.healthdata.org/gbd-2019/data-input-sources>

| <b>Input data for GBD 2019 national and subnational estimation of Pakistan</b>                                                                                                                                                                                                                                                                                                              |
|---------------------------------------------------------------------------------------------------------------------------------------------------------------------------------------------------------------------------------------------------------------------------------------------------------------------------------------------------------------------------------------------|
| Abbas SM, Alam AY, Majid A. To determine the probable causes of death in an urban slum community of Pakistan among adults 18 years and above by verbal autopsy. <i>J Pak Med Assoc.</i> 2011; 61(3): 235-8                                                                                                                                                                                  |
| Aga Khan University, All India Institute of Medical Sciences, New Delhi (AIIMS), Centre for Chronic Disease Control (India), Emory University (United States), Madras Diabetes Research Foundation, National Institute of Mental Health and Neurosciences (India), Public Health Foundation of India. Center for Cardio-Metabolic Risk Reduction in South Asia Surveillance Study 2010-2011 |
| Aga Khan University, Ministry of National Health Services, Regulations & Coordination (Pakistan), Ministry of Planning and Development (Pakistan), Pakistan Medical Research Council, United Nations Children's Fund (UNICEF). Pakistan National Nutrition Survey 2011                                                                                                                      |
| Agboatwalla M, Isomura S, Miyake K, Yamashita T, Morishita T, Akram D. Hepatitis A, B and C seroprevalence in Pakistan. <i>Indian J Pediatr.</i> 1994; 61(5): 545-9                                                                                                                                                                                                                         |
| Ahmad Z. Maternal mortality in an obstetric unit. <i>J Pak Med Assoc.</i> 1985; 35(8): 243-8                                                                                                                                                                                                                                                                                                |
| Akhtar R, Ullah Z, Paracha P, G Lutfullah. Impact assessment of salt iodization on the prevalence of goiter in district Swat. <i>Pak J Med Sci.</i> 2004; 303-7 as it appears in World Health Organization (WHO). WHO Global Database on Iodine Deficiency. Geneva, Switzerland: World Health Organization (WHO)                                                                            |
| Akram DS, Qureshi H, Mahmud A, Khan AA, Kundi Z, Shafi S, N-ur-Rehman, Olowokure B, Weil J, Bock H, Yazdani I. Seroepidemiology of varicella-zoster in Pakistan. <i>Southeast Asian J Trop Med Public Health.</i> 2000; 31(4): 646-9                                                                                                                                                        |
| Anjum KM, Qureshi MB, Khan MA, Jan N, Ali A, Ahmad K, Khan MD. Cataract blindness and visual outcome of cataract surgery in a tribal area in Pakistan. <i>Br J Ophthalmol.</i> 2006; 90(2): 135-8                                                                                                                                                                                           |
| Aurangzeb B, Nisar YB, Hazir T, Burki F, Hassan M. Clinical outcome in children hospitalized with complicated measles. <i>J Coll Physicians Surg Pak.</i> 2005; 15(9): 547-51                                                                                                                                                                                                               |
| Awan ZUR, Khan AK, Shah AH, Suleman M, Khan MA. Assessment of Malaria Prevalence Among School Children in Rural Areas of Bannu District Khyber Pakhtunkhwa, Pakistan. <i>Pak J Zool.</i> 2012; 44(2): 321-6 as it appears in Malaria Atlas Project. Malaria Atlas Project                                                                                                                   |

|                                                                                                                                                                                                                                                                                                                                                                          |
|--------------------------------------------------------------------------------------------------------------------------------------------------------------------------------------------------------------------------------------------------------------------------------------------------------------------------------------------------------------------------|
| Plasmodium Falciparum Parasite Rate Database. Oxford, United Kingdom: Malaria Atlas Project                                                                                                                                                                                                                                                                              |
| Awan ZUR, Shah HTA, Shah AH, Khan MA, Suleman M. Malaria Among the Students of Religious Schools of Bannu District, Khyber Pakhtunkhwa, Pakistan. Pak J Zool. 2012; 44(4): 959-62 as it appears in Malaria Atlas Project. Malaria Atlas Project Plasmodium Falciparum Parasite Rate Database. Oxford, United Kingdom: Malaria Atlas Project                              |
| Bachani AM, Ghaffar A, Hyder AA. Burden of fall injuries in Pakistan--analysis of the National Injury Survey of Pakistan. East Mediterr Health J. 2011; 17(5): 375-81                                                                                                                                                                                                    |
| Bangladesh National Blindness and Low Vision Prevalence Survey 1999-2000 as it appears in Bourne R, Global Burden of Disease Vision Loss Expert Group. Vision Loss Database - Survey Data on Vision Loss by Severity and Etiology. [Unpublished]                                                                                                                         |
| Bano N, Chaudhri R, Yasmeen L, Shafi F, Ejaz L. A study of maternal mortality in 8 principal hospitals in Pakistan in 2009. Int J Gynaecol Obstet. 2011; 114(3): 255-9                                                                                                                                                                                                   |
| Bashir R, Khan DA, Saleem M, Zaman KU, Malik IA. Blood lead levels and anemia in lead exposed workers. J Pak Med Assoc. 1995; 45(3): 64-6                                                                                                                                                                                                                                |
| Basit A, Danish Alvi SF, Fawwad A, Ahmed K, Yakoob Ahmedani M, Hakeem R. Temporal changes in the prevalence of diabetes, impaired fasting glucose and its associated risk factors in the rural area of Baluchistan. Diabetes Res Clin Pract. 2011; 94(3): 456-62                                                                                                         |
| Basit A, Hydrie MZ, Ahmed K, Hakeem R. Prevalence of diabetes, impaired fasting glucose and associated risk factors in a rural area of Baluchistan province according to new ADA criteria. J Pak Med Assoc. 2002; 52(8): 357-60                                                                                                                                          |
| Bhutani VK, Zipursky A, Blencowe H, Khanna R, Sgro M, Ebbesen F, Bell J, Mori R, Slusher TM, Fahmy N, Paul VK, Du L, Okolo AA, de Almeida MF, Olusanya BO, Kumar P, Cousens S, Lawn JE. Neonatal hyperbilirubinemia and Rhesus disease of the newborn: incidence and impairment estimates for 2010 at regional and global levels. Pediatr Res. 2013; 74(Suppl 1): 86-100 |
| Bhutta ZA, Rizvi A, Raza F, Hotwani S, Zaidi S, Moazzam Hossain S, Soofi S, Bhutta S. A comparative evaluation of multiple micronutrient and iron-folic acid supplementation during pregnancy in Pakistan: impact on pregnancy outcomes. Food Nutr Bull. 2009; 30(4 Suppl): S496-505                                                                                     |
| Bouma M, Rowland M. Failure of passive zooprophylaxis: cattle ownership in Pakistan is associated with a higher prevalence of malaria. Trans R Soc Trop Med Hyg. 1995; 89(4): 351-3 as it appears in Malaria Atlas Project. Malaria Atlas Project Plasmodium Falciparum Parasite Rate Database. Oxford, United Kingdom: Malaria Atlas Project                            |
| Bouma MJ, Parvez SD, Nesbit R, Winkler AM. Malaria control using permethrin applied to tents of nomadic Afghan refugees in northern Pakistan. Bull World Health Organ. 1996; 74(4): 413-21 as it appears in Malaria Atlas Project. Malaria Atlas Project Plasmodium Falciparum Parasite Rate Database. Oxford, United Kingdom: Malaria Atlas Project                     |
| Bourne R, Global Burden of Disease Vision Loss Expert Group. Vision Loss Database - Survey Data on Vision Loss by Severity and Etiology. [Unpublished]                                                                                                                                                                                                                   |
| Bureau of Statistics Punjab (Pakistan), United Nations Children's Fund (UNICEF), United Nations Development Programme (UNDP). Pakistan - Punjab Multiple Indicator Cluster                                                                                                                                                                                               |

|                                                                                                                                                                                                                                                                                                                                                                                                            |
|------------------------------------------------------------------------------------------------------------------------------------------------------------------------------------------------------------------------------------------------------------------------------------------------------------------------------------------------------------------------------------------------------------|
| Survey 2011. New York, United States of America: United Nations Children's Fund (UNICEF), 2013                                                                                                                                                                                                                                                                                                             |
| Bureau of Statistics Punjab (Pakistan), United Nations Children's Fund (UNICEF). Pakistan - Punjab Multiple Indicator Cluster Survey 2014. New York, United States of America: United Nations Children's Fund (UNICEF), 2015                                                                                                                                                                               |
| Bureau of Statistics, Planning and Development Department, Government of Sindh (Pakistan), Global Alliance for Improved Nutrition (GAIN), Pakistan Council of Research in Water Resource (PCRWR), United Nations Children's Fund (UNICEF). Pakistan - Sindh Multiple Indicator Cluster Survey 2014. Fairfax, United States of America: ICF International, 2016                                             |
| Census Organization, Ministry of Home Affairs (Pakistan). Pakistan Population and Housing Census 1961                                                                                                                                                                                                                                                                                                      |
| Census Organization, Ministry of Home Affairs (Pakistan). Pakistan Population and Housing Census 1972                                                                                                                                                                                                                                                                                                      |
| Centers for Disease Control and Prevention (CDC) and World Health Organization (WHO). Pakistan Global Youth Tobacco Survey 2003. Atlanta, United States: Centers for Disease Control and Prevention (CDC)                                                                                                                                                                                                  |
| Centers for Disease Control and Prevention (CDC), Johns Hopkins Bloomberg School of Public Health, Pakistan Bureau of Statistics, Research Triangle Institute, Inc. (RTI), World Health Organization (WHO). Pakistan Global Adult Tobacco Survey 2014                                                                                                                                                      |
| Centers for Disease Control and Prevention (CDC), Joint United Nations Program on HIV/AIDS (UNAIDS), Pakistan Medical Research Council, United Nations Children's Fund (UNICEF), United Nations Educational, Scientific and Cultural Organization (UNESCO), World Health Organization (WHO). Pakistan Global School-Based Student Health Survey 2009. Geneva, Switzerland: World Health Organization (WHO) |
| Central Statistical Office (Pakistan), Pakistan Institute of Development Economics. Pakistan Population Growth Estimation Experiment 1962-1965                                                                                                                                                                                                                                                             |
| Centre for Population Studies, London School of Hygiene and Tropical Medicine, National Institute of Population Studies (Pakistan). Pakistan Fertility and Family Planning Survey 1996-1997                                                                                                                                                                                                                |
| Chitsulo L, Engels D, Montresor A, Savioli L. The global status of schistosomiasis and its control. <i>Acta Trop.</i> 2000; 77(1): 41-51                                                                                                                                                                                                                                                                   |
| Committee for International Cooperation in National Research and Demography (CICRED). Pakistan Population Monograph 1974. Paris, France: Committee for International Cooperation in National Research and Demography (CICRED)                                                                                                                                                                              |
| Cystic Echinococcosis Endemicity Estimates identified through systematic review and personal communication, as provided by GBD 2015 expert. [Unpublished]                                                                                                                                                                                                                                                  |
| Durkin MS, Hasan ZM, Hasan KZ. Prevalence and correlates of mental retardation among children in Karachi, Pakistan. <i>Am J Epidemiol.</i> 1998; 147(3): 281-8                                                                                                                                                                                                                                             |
| Elahi MM, Elahi F, Elahi A, Elahi SB. Paediatric hearing loss in rural Pakistan. <i>J Otolaryngol.</i> 1998; 27(6): 348-53                                                                                                                                                                                                                                                                                 |
| Faisal A, Cleland J. Migrant men: a priority for HIV control in Pakistan? <i>Sex Transm Infect.</i> 2006; 82(4): 307-10                                                                                                                                                                                                                                                                                    |

|                                                                                                                                                                                                          |
|----------------------------------------------------------------------------------------------------------------------------------------------------------------------------------------------------------|
| FAO Supply Utilization Accounts 1961-2013. Personal Correspondence with Dr. Josef Schmidhuber, 2016. [Unpublished]                                                                                       |
| Fawad A, Naz H, Islam A, Zaffar S, Abbasi A-N. Maternal mortality in a tertiary care hospital. J Ayub Med Coll Abbottabad. 2011; 23(1): 92-5                                                             |
| Fawwad A, Alvi SFD, Basit A, Ahmed K, Ahmedani MY, Hakeem R. Changing pattern in the risk factors for diabetes in young adults from the rural area of Baluchistan. J Pak Med Assoc. 2013; 63(9): 1089–93 |
| Federal Bureau of Statistics (Pakistan) and World Bank. Pakistan Living Standards Measurement Survey 1991. Islamabad, Pakistan: Federal Bureau of Statistics (Pakistan)                                  |
| Federal Bureau of Statistics (Pakistan), National Institute of Population Studies (Pakistan). Pakistan Status of Women, Reproductive Health, and Family Planning Survey 2003                             |
| Federal Bureau of Statistics (Pakistan). Pakistan Core Welfare Indicators Questionnaire Survey 2004-2005. Islamabad, Pakistan: Pakistan Bureau of Statistics                                             |
| Federal Bureau of Statistics (Pakistan). Pakistan Demographic Survey 1990. Islamabad, Pakistan: Federal Bureau of Statistics (Pakistan)                                                                  |
| Federal Bureau of Statistics (Pakistan). Pakistan Demographic Survey 1991. Islamabad, Pakistan: Federal Bureau of Statistics (Pakistan)                                                                  |
| Federal Bureau of Statistics (Pakistan). Pakistan Demographic Survey 1992. Islamabad, Pakistan: Federal Bureau of Statistics (Pakistan)                                                                  |
| Federal Bureau of Statistics (Pakistan). Pakistan Demographic Survey 1995-1996. Islamabad, Pakistan: Federal Bureau of Statistics (Pakistan)                                                             |
| Federal Bureau of Statistics (Pakistan). Pakistan Demographic Survey 1999. Islamabad, Pakistan: Federal Bureau of Statistics (Pakistan)                                                                  |
| Federal Bureau of Statistics (Pakistan). Pakistan Demographic Survey 2001. Islamabad, Pakistan: Federal Bureau of Statistics (Pakistan)                                                                  |
| Federal Bureau of Statistics (Pakistan). Pakistan Demographic Survey 2003. Islamabad, Pakistan: Federal Bureau of Statistics (Pakistan)                                                                  |
| Federal Bureau of Statistics (Pakistan). Pakistan Demographic Survey 2005. Islamabad, Pakistan: Federal Bureau of Statistics (Pakistan)                                                                  |
| Federal Bureau of Statistics (Pakistan). Pakistan Demographic Survey 2006. Islamabad, Pakistan: Federal Bureau of Statistics (Pakistan)                                                                  |
| Federal Bureau of Statistics (Pakistan). Pakistan Demographic Survey 2007. Islamabad, Pakistan: Federal Bureau of Statistics (Pakistan)                                                                  |
| Federal Bureau of Statistics (Pakistan). Pakistan Integrated Household Survey 1998-1999. Islamabad, Pakistan: Federal Bureau of Statistics (Pakistan)                                                    |
| Federal Bureau of Statistics (Pakistan). Pakistan Integrated Household Survey 2001-2002. Islamabad, Pakistan: Federal Bureau of Statistics (Pakistan)                                                    |
| Federal Bureau of Statistics (Pakistan). Pakistan Social and Living Standards Measurement Survey 2004-2005. Islamabad, Pakistan: Federal Bureau of Statistics (Pakistan)                                 |
| Federal Bureau of Statistics (Pakistan). Pakistan Social and Living Standards Measurement Survey 2005-2006. Islamabad, Pakistan: Federal Bureau of Statistics (Pakistan)                                 |

|                                                                                                                                                                                                                           |
|---------------------------------------------------------------------------------------------------------------------------------------------------------------------------------------------------------------------------|
| Federal Bureau of Statistics (Pakistan). Pakistan Social and Living Standards Measurement Survey 2007-2008. Islamabad, Pakistan: Federal Bureau of Statistics (Pakistan)                                                  |
| Fikree FF, Azam SI, Berendes HW. Time to focus child survival programmes on the newborn: assessment of levels and causes of infant mortality in rural Pakistan. Bull World Health Organ. 2002; 80(4): 271-6               |
| Fikree FF, Midhet F, Sadruddin S, Berendes WH. Maternal mortality in different Pakistani sites: ratios, clinical causes and determinants. Acta Obstet Gynecol Scand. 1997; 76(7): 637-645                                 |
| Food and Agriculture Organization of the United Nations (FAO). FAOSTAT Commodity Balances - Crops Primary Equivalent. Rome, Italy: Food and Agriculture Organization of the United Nations (FAO)                          |
| Food and Agriculture Organization of the United Nations (FAO). FAOSTAT Food Balance Sheets, October 2014. Rome, Italy: Food and Agriculture Organization of the United Nations (FAO)                                      |
| Gallup, United Nations Children's Fund (UNICEF). Pakistan Multiple Indicator Cluster Survey 1995                                                                                                                          |
| Gillani S, Kazmi NHS, Najeeb S, Hussain S, Raza A. Frequencies of congenital anomalies among newborns admitted in nursery of Ayub Teaching Hospital Abbottabad, Pakistan. J Ayub Med Coll Abbottabad. 2011; 23(1): 117-21 |
| Global Burden of Disease 2010 Expert Group Working Document on Sense and Hearing Disorders                                                                                                                                |
| Government of Balochistan (Pakistan), United Nations Children's Fund (UNICEF). Pakistan - Balochistan Multiple Indicator Cluster Survey 2010. New York, United States of America: United Nations Children's Fund (UNICEF) |
| Government of Pakistan, Pakistan Bureau of Statistics, United Nations Office on Drugs and Crime (UNODC). Drug Use in Pakistan 2013. Vienna, Austria: United Nations Office on Drugs and Crime (UNODC)                     |
| Government of Pakistan. Pakistan Population and Housing Census 1951                                                                                                                                                       |
| Gustavson K-H. Prevalence and aetiology of congenital birth defects, infant mortality and mental retardation in Lahore, Pakistan: a prospective cohort study. Acta Paediatr. 2005; 94(6): 769-74                          |
| Hafeez A, Malik QU. Blood lead levels in preschool children in Rawalpindi. J Pak Med Assoc. 1996; 46(12): 272-4                                                                                                           |
| Haider S, Hussain A, Limburg H. Cataract blindness in Chakwal District, Pakistan: results of a survey. Ophthalmic Epidemiol. 2003; 10(4): 249-58                                                                          |
| Hasan Z, Aziz H. Report on a population survey of mental retardation in Pakistan. Int J Ment Health. 1981; 10(1): 23-7                                                                                                    |
| Hassan I, Haleem AA, Bhutta ZA. Profile and risk factors for congenital heart disease. J Pak Med Assoc. 1997; 47(3): 78-81                                                                                                |
| Heartfile, Ministry of Health (Pakistan), Statistics Division (Pakistan), World Health Organization (WHO). Pakistan Health Indicators 2007. Islamabad, Pakistan: Heartfile, 2007                                          |



|                                                                                                                                                                                                                                                                                                                                                                              |
|------------------------------------------------------------------------------------------------------------------------------------------------------------------------------------------------------------------------------------------------------------------------------------------------------------------------------------------------------------------------------|
| Herekar A, Ahmed B, Effendi J, Latif U, Alvi Z, Steiner TJ on behalf of the Headache Research Foundation of Pakistan and Lifting The Burden: the Global Campaign against Headache. Pakistan Measuring the Burden of Headache in the General Population 2009 [Unpublished]                                                                                                    |
| Huilan S, Zhen LG, Mathan MM, Mathew MM, Olarte J, Espejo R, Khin Maung U, Ghafoor MA, Khan MA, Sami Z. Etiology of acute diarrhoea among children in developing countries: a multicentre study in five countries. Bull World Health Organ. 1991; 69(5): 549-55                                                                                                              |
| Hyder O, Ijaz M, Arshad MA, Zahira T. Frequency of VDRL seropositivity among clinically healthy adult men from districts of Punjab province in Pakistan. Sex Transm Infect. 2010; 86(7): 513                                                                                                                                                                                 |
| ICF International, National Institute of Population Studies (Pakistan), Pakistan Bureau of Statistics. Pakistan Demographic and Health Survey 2012-2013. Fairfax, United States of America: ICF International                                                                                                                                                                |
| Institute for Resource Development, Macro Systems, National Institute of Population Studies (Pakistan). Pakistan Demographic and Health Survey 1990-1991. Fairfax, United States of America: ICF International                                                                                                                                                               |
| International Bank for Reconstruction and Development, World Bank (WB). Characterizing the HIV/AIDS Epidemic in the Middle East and North Africa 2010. Washington, D.C., United States of America: International Bank for Reconstruction and Development, World Bank (WB), 2010                                                                                              |
| International Labour Organization (ILO). International Labour Organization Database (ILOSTAT) - Employment by Sex and Economic Activity. International Labour Organization (ILO)                                                                                                                                                                                             |
| International Labour Organization (ILO). International Labour Organization Database (ILOSTAT) - Employment by Sex and Occupation. International Labour Organization (ILO)                                                                                                                                                                                                    |
| International Labour Organization (ILO). International Labour Organization Database (ILOSTAT) - Fatal Injuries by Sex and Economic Activity. International Labour Organization (ILO)                                                                                                                                                                                         |
| International Monetary Fund (IMF). World Economic Outlook Database. Washington, D.C., United States of America: International Monetary Fund (IMF)                                                                                                                                                                                                                            |
| International Road Federation. World Road Statistics 1963-1999. Geneva, Switzerland: International Road Federation                                                                                                                                                                                                                                                           |
| International Road Federation. World Road Statistics 2015. Geneva, Switzerland: International Road Federation, 2015                                                                                                                                                                                                                                                          |
| Iqbal J, Rab A, Perlmann P, Berzins K. Humoral Immune Responses to Plasmodium falciparum Antigens in Children and Adults Living in a Hypoendemic Area of Punjab (Pakistan). Am J Trop Med Hyg. 1994; 51(4): 444-53 as it appears in Malaria Atlas Project. Malaria Atlas Project Plasmodium Falciparum Parasite Rate Database. Oxford, United Kingdom: Malaria Atlas Project |
| Iqbal MP, Mehboobali N, Tareen AK, Yakub M, Iqbal SP, Iqbal K, Haider G. Association of body iron status with the risk of premature acute myocardial infarction in a Pakistani population. PLoS One. 2013; 8(6): e67981                                                                                                                                                      |
| Jafarey SN, Rizvi T, Koblinsky M, Kureshy N. Verbal autopsy of maternal deaths in two districts of Pakistan--filling information gaps. J Health Popul Nutr. 2009; 27(2): 170-83                                                                                                                                                                                              |

|                                                                                                                                                                                                                                                                                                                                                  |
|--------------------------------------------------------------------------------------------------------------------------------------------------------------------------------------------------------------------------------------------------------------------------------------------------------------------------------------------------|
| Jehan I, Harris H, Salat S, Zeb A, Mobeen N, Pasha O, McClure EM, Moore J, Wright LL, Goldenberg RL. Neonatal mortality, risk factors and causes: a prospective population-based cohort study in urban Pakistan. <i>Bull World Health Organ.</i> 2009; 87(2): 130-8                                                                              |
| Jehan I, Zaidi S, Rizvi S, Mobeen N, McClure EM, Munoz B, Pasha O, Wright LL, Goldenberg RL. Dating gestational age by last menstrual period, symphysis-fundal height, and ultrasound in urban Pakistan. <i>Int J Gynaecol Obstet.</i> 2010; 110(3): 231-4                                                                                       |
| Jensen PK, Ensink JHJ, Jayasinghe G, van der Hoek W, Cairncross S, Dalsgaard A. Effect of chlorination of drinking-water on water quality and childhood diarrhoea in a village in Pakistan. <i>J Health Popul Nutr.</i> 2003; 21(1): 26-31                                                                                                       |
| JM A. Factors affecting the outcome in babies with hypoxic ischemic encephalopathy. <i>Ann Pak Inst Med Sci.</i> 2006; 2(3): 158-62                                                                                                                                                                                                              |
| Joint United Nations Program on HIV/AIDS (UNAIDS), National AIDS Control Programme Pakistan (NAS COP). Pakistan Global AIDS Response Progress Report 2015. Geneva, Switzerland: Joint United Nations Program on HIV/AIDS (UNAIDS), 2015                                                                                                          |
| Jokhio AH, Rizvi RM, Rizvi J, MacArthur C. Prevalence of obstetric fistula: a population-based study in rural Pakistan. <i>BJOG.</i> 2014; 121(8): 1039-46                                                                                                                                                                                       |
| Kadir MM, Janjua NZ, Kristensen S, Fatmi Z, Sathiakumar N. Status of children's blood lead levels in Pakistan: implications for research and policy. <i>Public Health.</i> 2008; 122(7): 708-15                                                                                                                                                  |
| Khan A, Tanaka Y, Azam Z, Abbas Z, Kurbanov F, Saleem U, Hamid S, Jafri W, Mizokami M. Epidemic spread of hepatitis C virus genotype 3a and relation to high incidence of hepatocellular carcinoma in Pakistan. <i>J Med Virol.</i> 2009; 81(7): 1189-97                                                                                         |
| Khan AA. Prevalence of dental caries in school children of Lahore, Pakistan. <i>Community Dent Oral Epidemiol.</i> 1992; 20(3): 155                                                                                                                                                                                                              |
| Khan AH, Khan A, Ghani F, Khurshid M. Low-level lead exposure and blood lead levels in children: a cross-sectional survey. <i>Arch Environ Health.</i> 2001; 56(6): 501-5                                                                                                                                                                        |
| Khan AJ, Khan JA, Akbar M, Addiss DG. Acute respiratory infections in children: a case management intervention in Abbottabad District, Pakistan. <i>Bull World Health Organ.</i> 1990; 68(5): 577-85                                                                                                                                             |
| Khan DA, Malik IA, Saleem M, Hashim R, Bashir R. Screening for chronic lead poisoning in lead factory workers. <i>J Pak Med Assoc.</i> 1994; 44(10): 239-41                                                                                                                                                                                      |
| Khan E, Siddiqui J, Shakoor S, Mehraj V, Jamil B, Hasan R. Dengue outbreak in Karachi, Pakistan, 2006: experience at a tertiary care center. <i>Trans R Soc Trop Med Hyg.</i> 2007; 101(11): 1114-9                                                                                                                                              |
| Khan FS, Lotia-Farrukh I, Khan AJ, Siddiqui ST, Sajun SZ, Malik AA, Burfat A, Arshad MH, Codlin AJ, Reininger BM, McCormick JB, Afridi N, Fisher-Hoch SP. The burden of non-communicable disease in transition communities in an Asian megacity: baseline findings from a cohort study in Karachi, Pakistan. <i>PLoS One.</i> 2013; 8(2): e56008 |
| Khan MH, Khan I, Shah SH, Rashid Q. Lead poisoning--a hazard of traffic and industries in Pakistan. <i>J Environ Pathol Toxicol Oncol.</i> 1995; 14(2): 117-20                                                                                                                                                                                   |
| Khan MS, Subhan F, Tahir F, Kazi BM, Dil AS, Sultan S, Deepa F, Khan F, Sheikh MA. Prevalence of blood groups and Rh factor in Bannu region (NWFP) Pakistan. <i>Pak J Med Res.</i> 2004; 43(1)                                                                                                                                                   |
| Khan SR, Jalil F, Zaman S, Lindblad BS, Karlberg J. Early child health in Lahore, Pakistan: X. Mortality. <i>Acta Paediatr Suppl.</i> 1993; 82(390): 109-17                                                                                                                                                                                      |

|                                                                                                                                                                                                                                                                                                                                                                               |
|-------------------------------------------------------------------------------------------------------------------------------------------------------------------------------------------------------------------------------------------------------------------------------------------------------------------------------------------------------------------------------|
| Khawaja M. Lead Exposure And Children: Blood Lead Levels in School Children Resulting From Leaded Petrol Use and Increasing Road Traffic in Pakistan. Islamabad, Pakistan: Sustainable Development Policy Institute (Pakistan), 2003                                                                                                                                          |
| Khawaja MA. Lead and children development with special reference to studies in Pakistan on blood lead levels in school children [abstract]. In: Conference Booklet of the International Conference on Environmental Threats to the Health of Children: Hazards and Vulnerability; 2002 Mar 3-7; Bangkok, Thailand. Geneva: World Health Organization, Abstracts and Index; 82 |
| KNCV Tuberculosis Foundation, Ministry of Inter Provincial Coordination (Pakistan), National Tuberculosis Control Program (Pakistan). Pakistan Prevalence of Pulmonary Tuberculosis Among the Adult Population Survey 2010-2011                                                                                                                                               |
| Lambo JA, Memon MI, Khahro ZH, Lashari MI. Epidemiology of neonatal tetanus in rural Pakistan. <i>J Pak Med Assoc.</i> 2011; 61(11): 1099-103                                                                                                                                                                                                                                 |
| Lone FW, Qureshi RN, Emmanuel F. Maternal anaemia and its impact on perinatal outcome in a tertiary care hospital in Pakistan. <i>East Mediterr Health J.</i> 2004; 10(6): 801-7                                                                                                                                                                                              |
| Luby SP, Agboatwalla M, Feikin DR, Painter J, Billhimer W, Altaf A, Hoekstra, RM. Effect of handwashing on child health: a randomised controlled trial. <i>Lancet.</i> 2005; 366(9481): 225-233                                                                                                                                                                               |
| Luby SP, Agboatwalla M, Hoekstra RM, Rahbar MH, Billhimer W, Keswick BH. Delayed effectiveness of home-based interventions in reducing childhood diarrhea, Karachi, Pakistan. <i>Am J Trop Med Hyg.</i> 2004; 71(4): 420-7                                                                                                                                                    |
| Luby SP, Agboatwalla M, Painter J, Altaf A, Billhimer W, Keswick B, Hoekstra RM. Combining drinking water treatment and hand washing for diarrhoea prevention, a cluster randomised controlled trial. <i>Trop Med Int Health.</i> 2006; 11(4): 479-89                                                                                                                         |
| Luby SP, Agboatwalla M, Painter J, Altaf A, Billhimer WL, Hoekstra RM. Effect of intensive handwashing promotion on childhood diarrhea in high-risk communities in Pakistan: a randomized controlled trial. <i>JAMA.</i> 2004; 291(21): 2547-54                                                                                                                               |
| Macro International, Inc, National Institute of Population Studies (Pakistan). Pakistan Demographic and Health Survey - Complete Birth History Data                                                                                                                                                                                                                           |
| Macro International, Inc, National Institute of Population Studies (Pakistan). Pakistan Demographic and Health Survey 2006-2007. Fairfax, United States of America: ICF International                                                                                                                                                                                         |
| Malaria Atlas Project. Malaria Atlas Project Plasmodium Falciparum Parasite Rate Database. Oxford, United Kingdom: Malaria Atlas Project                                                                                                                                                                                                                                      |
| Malik IA, Ahmad N, Luqman M, Legters LJ, Khalil-Ullah, Zaheeruddin, Ahmed A, Bukhtiari N, Nabi S, Mubarik A. Hepatitis C as a cause of chronic liver disease in northern Pakistan. <i>J Pak Med Assoc.</i> 1992; 42(3): 67-8                                                                                                                                                  |
| Marsh D, Majid N, Rasmussen Z, Mateen K, Khan AA. Cause-specific child mortality in a mountainous community in Pakistan by verbal autopsy. <i>J Pak Med Assoc.</i> 1993; 43(11): 226-9                                                                                                                                                                                        |
| Mathers BM, Degenhardt L, Phillips B, Wiessing L, Hickman M, Strathdee SA, Wodak A, Panda S, Tyndall M, Toufik A, Mattick RP. Global epidemiology of injecting drug use and HIV among people who inject drugs: a systematic review. <i>Lancet.</i> 2008; 372: 1733-1745                                                                                                       |
| Ministry of Health (Pakistan). Pakistan EPI Coverage Evaluation Survey 2005                                                                                                                                                                                                                                                                                                   |

|                                                                                                                                                                                                                                                                                                                                                                                                                                 |
|---------------------------------------------------------------------------------------------------------------------------------------------------------------------------------------------------------------------------------------------------------------------------------------------------------------------------------------------------------------------------------------------------------------------------------|
| Ministry of Narcotics Control (Pakistan), United Nations Office on Drugs and Crime (UNODC). Pakistan National Drug Abuse Assessment Study 2006-2007                                                                                                                                                                                                                                                                             |
| Ministry of Planning and Development (Pakistan). Pakistan Contraceptive Prevalence Survey 1984-1985                                                                                                                                                                                                                                                                                                                             |
| Ministry of Population Welfare (Pakistan), Population Council, United Nations Population Fund (UNFPA). Pakistan Contraceptive Prevalence Survey 1994-1995                                                                                                                                                                                                                                                                       |
| Mir AM, Wajid A, Reichenbach L, Khan M, Masood I. Herpes Simplex Virus-2 infection amongst urban male population in Pakistan. <i>J Pak Med Assoc.</i> 2010; 60(11): 918-22                                                                                                                                                                                                                                                      |
| Mir AM, Wajid A, Reichenbach L, Khan M. STI prevalence and associated factors among urban men in Pakistan. <i>Sex Transm Infect.</i> 2009; 85(3): 199-200                                                                                                                                                                                                                                                                       |
| Murray M, Rasmussen Z. Measles outbreak in a northern Pakistani village: epidemiology and vaccine effectiveness. <i>Am J Epidemiol.</i> 2000; 151(8): 811                                                                                                                                                                                                                                                                       |
| Nanan D, White F, Azam I, Afsar H, Hozhabri S. Evaluation of a water, sanitation, and hygiene education intervention on diarrhoea in northern Pakistan. <i>Bull World Health Organ.</i> 2003; 81(3): 160-5                                                                                                                                                                                                                      |
| Nasrin D, Wu Y, Blackwelder WC, Farag TH, Saha D, Sow SO, Alonso PL, Breiman RF, Sur D, Faruque ASG, Zaidi AKM, Biswas K, Van Eijk AM, Walker DG, Levine MM, Kotloff KL. Health care seeking for childhood diarrhea in developing countries: evidence from seven sites in Africa and Asia. <i>Am J Trop Med Hyg.</i> 2013; 89(1 Suppl): 3-12                                                                                    |
| National Institute of Population Studies (Pakistan). Pakistan Contraceptive Prevalence Survey 1993                                                                                                                                                                                                                                                                                                                              |
| National Institute of Population Studies (Pakistan). Pakistan Reproductive Health and Family Planning Survey 2000-2001                                                                                                                                                                                                                                                                                                          |
| Nisar N, Sohoo NA. Maternal mortality in rural community: a challenge for achieving millennium development goal. <i>J Pak Med Assoc.</i> 2010; 60(1): 20-4                                                                                                                                                                                                                                                                      |
| Nuruddin R, Lim MK, Hadden WC, Azam I. Comparison of estimates of under-nutrition for pre-school rural Pakistani children based on the WHO standard and the National Center for Health Statistics (NCHS) reference. <i>Public Health Nutr.</i> 2009; 12(5): 716-22 as it appears in World Health Organization (WHO). WHO Global Database on Child Growth and Malnutrition. Geneva, Switzerland: World Health Organization (WHO) |
| Odhiambo JA, Williams HC, Clayton TO, Robertson CF, Asher MI, ISAAC Phase Three Study Group. Global variations in prevalence of eczema symptoms in children from ISAAC Phase Three. <i>J Allergy Clin Immunol.</i> 2009; 124(6): 1251-1258                                                                                                                                                                                      |
| Owais A, Tikmani SS, Sultana S, Zaman U, Ahmed I, Allana S, Zaidi AK. Incidence of pneumonia, bacteremia, and invasive pneumococcal disease in Pakistani children. <i>Trop Med Int Health.</i> 2010; 15(9): 1029-36                                                                                                                                                                                                             |
| Pakistan - Balochistan and North West Frontier Afghan Refugee Infant Mortality and Childhood Nutritional Status Survey 1990 as it appears in World Health Organization (WHO). WHO Global Database on Child Growth and Malnutrition - Historical. Geneva, Switzerland: World Health Organization (WHO)                                                                                                                           |
| Pakistan - Balochistan Survey of Nutritional Status of Children Under Five Among Afghan Refugees 1991 as it appears in World Health Organization (WHO). WHO Global Database on                                                                                                                                                                                                                                                  |

|                                                                                                                                                                                                                                                                                                                |
|----------------------------------------------------------------------------------------------------------------------------------------------------------------------------------------------------------------------------------------------------------------------------------------------------------------|
| Child Growth and Malnutrition - Historical. Geneva, Switzerland: World Health Organization (WHO)                                                                                                                                                                                                               |
| Pakistan - Sindh Maternal Care Survey 1998 as it appears in World Health Organization (WHO). WHO Global Database on Child Growth and Malnutrition - Historical. Geneva, Switzerland: World Health Organization (WHO)                                                                                           |
| Pakistan - South Karachi Cancer Registry 1995-1997 - CI5 as it appears in Parkin DM, International Agency for Research on Cancer, International Association of Cancer Registries. Cancer Incidence in Five Continents. Vol. I to VIII. Lyon, France, IARC Press, 2005                                          |
| Pakistan - South Karachi Cancer Registry 1998-2002 - CI5 as it appears in Curado MP, Edwards B, Shin HR, Storm H, Ferlay J, Heanue M and Boyle P, eds (2007). Cancer Incidence in Five Continents, Vol. IX Periodic Data (electronic version). Lyon, IARC. <a href="http://ci5.iarc.fr">http://ci5.iarc.fr</a> |
| Pakistan Bureau of Statistics. Pakistan Integrated Household Survey 1995-1996                                                                                                                                                                                                                                  |
| Pakistan Bureau of Statistics. Pakistan Social and Living Standards Measurement Survey 2008-2009. Islamabad, Pakistan: Pakistan Bureau of Statistics                                                                                                                                                           |
| Pakistan Bureau of Statistics. Pakistan Social and Living Standards Measurement Survey 2010-2011. Islamabad, Pakistan: Pakistan Bureau of Statistics                                                                                                                                                           |
| Pakistan Bureau of Statistics. Pakistan Social and Living Standards Measurement Survey/ Household Integrated Economic Survey 2011-2012. Islamabad, Pakistan: Pakistan Bureau of Statistics                                                                                                                     |
| Pakistan Bureau of Statistics. Pakistan Social and Living Standards Measurement Survey/ Household Integrated Economic Survey 2013-2014                                                                                                                                                                         |
| Pakistan Demographic Survey 1984 as it appears in United Nations Statistics Division (UNSD). United Nations Demographic Yearbook - Historical Supplement 1997. New York, United States of America: United Nations (UN)                                                                                         |
| Pakistan Demographic Survey 1985 as it appears in United Nations Statistics Division (UNSD). United Nations Demographic Yearbook - Historical Supplement 1997. New York, United States of America: United Nations (UN)                                                                                         |
| Pakistan Demographic Survey 1986 as it appears in United Nations Statistics Division (UNSD). United Nations Demographic Yearbook - Historical Supplement 1997. New York, United States of America: United Nations (UN)                                                                                         |
| Pakistan Demographic Survey 1987 as it appears in United Nations Statistics Division (UNSD). United Nations Demographic Yearbook - Historical Supplement 1997. New York, United States of America: United Nations (UN)                                                                                         |
| Pakistan Demographic Survey 1988 as it appears in United Nations Statistics Division (UNSD). United Nations Demographic Yearbook - Historical Supplement 1997. New York, United States of America: United Nations (UN)                                                                                         |
| Pakistan Demographic Survey 1989 as it appears in United Nations Statistics Division (UNSD). United Nations Demographic Yearbook - Historical Supplement 1997. New York, United States of America: United Nations (UN)                                                                                         |
| Pakistan Demographic Survey 1993 as it appears in United Nations Statistics Division (UNSD). United Nations Demographic Yearbook - Historical Supplement 1997. New York, United States of America: United Nations (UN)                                                                                         |

|                                                                                                                                                                                                                                         |
|-----------------------------------------------------------------------------------------------------------------------------------------------------------------------------------------------------------------------------------------|
| Pakistan Demographic Survey 1997 as it appears in United Nations Statistics Division (UNSD). United Nations Demographic Yearbook 2001. New York, United States of America: United Nations (UN), 2003                                    |
| Pakistan National Health Survey 1990-1994 as it appears in World Health Organization (WHO). WHO Global Database on Child Growth and Malnutrition. Geneva, Switzerland: World Health Organization (WHO)                                  |
| Pakistan National Nutrition Survey 1985-1987 as it appears in World Health Organization (WHO). WHO Global Database on Child Growth and Malnutrition. Geneva, Switzerland: World Health Organization (WHO)                               |
| Pakistan National Nutrition Survey 2001-2002 as it appears in World Health Organization (WHO). WHO Global Database on Iodine Deficiency. Geneva, Switzerland: World Health Organization (WHO)                                           |
| Pakistan National Survey on Blindness and Low Vision 2002-2004. [Unpublished]                                                                                                                                                           |
| Pakistan Population Growth Survey 1976-1979 as it appears in United Nations Statistics Division (UNSD). United Nations Demographic Yearbook - Historical Supplement 1997. New York, United States of America: United Nations (UN)       |
| Pakistan Sample Registration System 1968 as it appears in United Nations Statistics Division (UNSD). United Nations Demographic Yearbook. New York City, United States of America: United Nations Statistics Division (UNSD)            |
| Pakistan Vital Registration Live Births Data 1968 as it appears in United Nations Statistics Division (UNSD). United Nations Demographic Yearbook - Historical Supplement 1997. New York, United States of America: United Nations (UN) |
| Pakistan Vital Registration Live Births Data 1976 as it appears in United Nations Statistics Division (UNSD). United Nations Demographic Yearbook - Historical Supplement 1997. New York, United States of America: United Nations (UN) |
| Pakistan Vital Registration Live Births Data 1977 as it appears in United Nations Statistics Division (UNSD). United Nations Demographic Yearbook - Historical Supplement 1997. New York, United States of America: United Nations (UN) |
| Pakistan Vital Registration Live Births Data 1978 as it appears in United Nations Statistics Division (UNSD). United Nations Demographic Yearbook - Historical Supplement 1997. New York, United States of America: United Nations (UN) |
| Pakistan Vital Registration Live Births Data 1979 as it appears in United Nations Statistics Division (UNSD). United Nations Demographic Yearbook - Historical Supplement 1997. New York, United States of America: United Nations (UN) |
| Pakistan Vital Registration Live Births Data 1984 as it appears in United Nations Statistics Division (UNSD). United Nations Demographic Yearbook - Historical Supplement 1997. New York, United States of America: United Nations (UN) |
| Pakistan Vital Registration Live Births Data 1985 as it appears in United Nations Statistics Division (UNSD). United Nations Demographic Yearbook - Historical Supplement 1997. New York, United States of America: United Nations (UN) |
| Pakistan Vital Registration Live Births Data 1986 as it appears in United Nations Statistics Division (UNSD). United Nations Demographic Yearbook - Historical Supplement 1997. New York, United States of America: United Nations (UN) |

|                                                                                                                                                                                                                                                                   |
|-------------------------------------------------------------------------------------------------------------------------------------------------------------------------------------------------------------------------------------------------------------------|
| Pakistan Vital Registration Live Births Data 1987 as it appears in United Nations Statistics Division (UNSD). United Nations Demographic Yearbook - Historical Supplement 1997. New York, United States of America: United Nations (UN)                           |
| Pakistan Vital Registration Live Births Data 1988 as it appears in United Nations Statistics Division (UNSD). United Nations Demographic Yearbook - Historical Supplement 1997. New York, United States of America: United Nations (UN)                           |
| Pakistan Vital Registration Live Births Data 1989 as it appears in United Nations Statistics Division (UNSD). United Nations Demographic Yearbook - Historical Supplement 1997. New York, United States of America: United Nations (UN)                           |
| Pakistan Vital Registration Live Births Data 1990 as it appears in United Nations Statistics Division (UNSD). United Nations Demographic Yearbook - Historical Supplement 1997. New York, United States of America: United Nations (UN)                           |
| Pakistan Vital Registration Live Births Data 1991 as it appears in United Nations Statistics Division (UNSD). United Nations Demographic Yearbook - Historical Supplement 1997. New York, United States of America: United Nations (UN)                           |
| Pakistan Vital Registration Live Births Data 1992 as it appears in United Nations Statistics Division (UNSD). United Nations Demographic Yearbook - Historical Supplement 1997. New York, United States of America: United Nations (UN)                           |
| Pakistan Vital Registration Live Births Data 1993 as it appears in United Nations Statistics Division (UNSD). United Nations Demographic Yearbook - Historical Supplement 1997. New York, United States of America: United Nations (UN)                           |
| Parveen Z. Birth weight percentiles by gestational age: a hospital based study. J Ayub Med Coll Abbottabad. 2001; 13(2): 22-7                                                                                                                                     |
| Pau A, Khan SS, Babar MG, Croucher R. Dental pain and care-seeking in 11-14-yr-old adolescents in a low-income country. Eur J Oral Sci. 2008; 116(5): 451-7                                                                                                       |
| Perveen S. Frequency and impact of hypertensive disorders of pregnancy. J Ayub Med Coll Abbottabad. 2014; 26(4): 518–21                                                                                                                                           |
| Pew Research Center. The Future of the Global Muslim Population. Washington, DC, United States: Pew Research Center, 2011                                                                                                                                         |
| Population Census Organization (Pakistan), Minnesota Population Center. Pakistan Housing and Population Census 1981 from the Integrated Public Use Microdata Series, International: [Machine-readable database]. Minneapolis: University of Minnesota             |
| Population Census Organization (Pakistan), Minnesota Population Center. Pakistan Housing and Population Census 1998 from the Integrated Public Use Microdata Series, International: [Machine-readable database]. Minneapolis: University of Minnesota             |
| Population Census Organization (Pakistan), Minnesota Population Center. Pakistan Housing, Economic, and Demographic Survey 1973 from the Integrated Public Use Microdata Series, International: [Machine-readable database]. Minneapolis: University of Minnesota |
| Population Census Organization (Pakistan). Pakistan Population and Housing Census 1980-1981                                                                                                                                                                       |
| Population Census Organization (Pakistan). Pakistan Population and Housing Census 1998                                                                                                                                                                            |

|                                                                                                                                                                                                                                                                                                                                                                                     |
|-------------------------------------------------------------------------------------------------------------------------------------------------------------------------------------------------------------------------------------------------------------------------------------------------------------------------------------------------------------------------------------|
| Population Welfare Division, Ministry of Planning and Development (Pakistan), International Statistical Institute. Pakistan World Fertility Survey 1975. Voorburg, Netherlands: International Statistical Institute                                                                                                                                                                 |
| Poverty, Household Food Security, and Nutrition in Rural Pakistan as it appears in World Health Organization (WHO). WHO Global Database on Child Growth and Malnutrition - Historical. Geneva, Switzerland: World Health Organization (WHO)                                                                                                                                         |
| Pullan RL, Smith JL, Jasrasaria R, Brooker SJ. Global numbers of infection and disease burden of soil transmitted helminth infections in 2010 [Unpublished data]. Parasit Vectors. 2014; 7(37). [Unpublished data as provided by the Global Burden of Disease 2010 soil transmitted helminths expert group]                                                                         |
| Quadri F, Nasrin D, Khan A, Bokhari T, Tikmani SS, Nisar MI, Bhatti Z, Kotloff K, Levine MM, Zaidi AK. Health care use patterns for diarrhea in children in low-income periurban communities of Karachi, Pakistan. Am J Trop Med Hyg. 2013; 89(1 Suppl): 49-55                                                                                                                      |
| Qureshi H, Bile KM, Jooma R, Alam SE, Afridi HUR. Prevalence of hepatitis B and C viral infections in Pakistan: findings of a national survey appealing for effective prevention and control measures. East Mediterr Health J. 2010; S15-23                                                                                                                                         |
| Rahbar MH, White F, Agboatwalla M, Hozhabri S, Luby S. Factors associated with elevated blood lead concentrations in children in Karachi, Pakistan. Bull World Health Organ. 2002; 80(10): 769-75                                                                                                                                                                                   |
| Rahman S, Khalid N, Zaidi JH, Ahmad S, Iqbal MZ. Non-occupational lead exposure and hypertension in Pakistani adults. J Zhejiang Univ Sci B. 2006; 7(9): 732-7                                                                                                                                                                                                                      |
| Rehman K, Yaqub M, Sheri AN. Human Environmental Control: Lead Levels in Blood. J Pak Med Assoc. 1988; 220-1                                                                                                                                                                                                                                                                        |
| Rizvi SF, Khan MA, Kundi A, Marsh DR, Samad A, Pasha O. Status of rheumatic heart disease in rural Pakistan. Heart. 2004; 90(4): 394-9                                                                                                                                                                                                                                              |
| Ronald AR, Underwood BA, Woodward TE. Glucose-6-phosphate dehydrogenase deficiency in Pakistani males. Trans R Soc Trop Med Hyg. 1968; 62(4): 531-3                                                                                                                                                                                                                                 |
| Rowland M, Bouma M, Ducornez D, Durrani N, Rozendaal J, Schapira A, Sondorp E. Pyrethroid-impregnated bed nets for personal protection against malaria for Afghan refugees. Trans R Soc Trop Med Hyg. 1996; 90(4): 357-61 as it appears in Malaria Atlas Project. Malaria Atlas Project Plasmodium Falciparum Parasite Rate Database. Oxford, United Kingdom: Malaria Atlas Project |
| Rowland M, Durrani N, Kenward M, Mohammed N, Urahman H, Hewitt S. Control of malaria in Pakistan by applying deltamethrin insecticide to cattle: a community-randomised trial. Lancet. 2001; 357(9271): 1837-41 as it appears in Malaria Atlas Project. Malaria Atlas Project Plasmodium Falciparum Parasite Rate Database. Oxford, United Kingdom: Malaria Atlas Project           |
| Rowland M, Hewitt S, Durrani N, Bano N, Wirtz R. Transmission and control of vivax malaria in Afghan refugee settlements in Pakistan. Trans R Soc Trop Med Hyg. 1997; 91(3): 252-5 as it appears in Malaria Atlas Project. Malaria Atlas Project Plasmodium Falciparum Parasite Rate Database. Oxford, United Kingdom: Malaria Atlas Project                                        |
| Rowland M, Hewitt S, Durrani N. Prevalence of malaria in Afghan refugee villages in Pakistan sprayed with lambda-cyhalothrin or malathion. Trans R Soc Trop Med Hyg. 1994; 88(4): 378-9                                                                                                                                                                                             |



|                                                                                                                                                                                                                                                                                                                                                                      |
|----------------------------------------------------------------------------------------------------------------------------------------------------------------------------------------------------------------------------------------------------------------------------------------------------------------------------------------------------------------------|
| as it appears in Malaria Atlas Project. Malaria Atlas Project Plasmodium Falciparum Parasite Rate Database. Oxford, United Kingdom: Malaria Atlas Project                                                                                                                                                                                                            |
| Rowland M, Mahmood P, Iqbal J, Carneiro I, Chavasse D. Indoor residual spraying with alphacypermethrin controls malaria in Pakistan: a community-randomized trial. Trop Med Int Health. 2000; 5(7): 472-81 as it appears in Malaria Atlas Project. Malaria Atlas Project Plasmodium Falciparum Parasite Rate Database. Oxford, United Kingdom: Malaria Atlas Project |
| Sadiq M, Islam K, Abid R, Latif F, Rehman AU, Waheed A, Azhar M, Khan JS. Prevalence of rheumatic heart disease in school children of urban Lahore. Heart. 2009; 95(5): 353-7                                                                                                                                                                                        |
| Saeed F, Jawad A, Azmat A, Azam I, Kagazwala S. Anthropometric measurements as a risk for hypertensive disorders in pregnancy: a hospital based study in South Asian population. J Pak Med Assoc. 2011; 61(1): 58-63                                                                                                                                                 |
| Sajan F, Fikree FF. Perceived gynecological morbidity among young ever-married women living in squatter settlements of Karachi, Pakistan. J Pak Med Assoc. 1999; 49(4): 92-7                                                                                                                                                                                         |
| Shah F, Kazi TG, Afridi HI, Baig JA, Khan S, Kolachi NF, Wadhwa SK, Shah AQ. Environmental exposure of lead and iron deficit anemia in children age ranged 1-5 years: a cross sectional study. Sci Total Environ. 2010; 408(22): 5325-30                                                                                                                             |
| Shah SM, Nanan D, Rahbar MH, Rahim M, Nowshad G. Assessing obesity and overweight in a high mountain Pakistani population. Trop Med Int Health. 2004; 9(4): 526-32                                                                                                                                                                                                   |
| Shah SMA, Luby S, Rahbar M, Khan AW, McCormick JB. Hypertension and its determinants among adults in high mountain villages of the Northern Areas of Pakistan. J Hum Hypertens. 2001; 15(2): 107-12                                                                                                                                                                  |
| Shaikh SP, Aziz TM. Rapid assessment of cataract surgical services in age group 50 years and above in Lower Dir District Malakand, Pakistan. J Coll Physicians Surg Pak. 2005; 15(3): 145-8                                                                                                                                                                          |
| Shera AS, Jawad F, Maqsood A. Prevalence of diabetes in Pakistan. Diabetes Res Clin Pract. 2007; 76(2): 219-22                                                                                                                                                                                                                                                       |
| Siddiqui FJ, Haider SR, Bhutta ZA. Endemic dengue fever: a seldom recognized hazard for Pakistani children. J Infect Dev Ctries. 2009; 3(4): 306-12                                                                                                                                                                                                                  |
| Siddiqui SA, Soomro N, Shabih-ul-Hasnain F. Severe obstetric morbidity and its outcome in patients presenting in a tertiary care hospital of Karachi. J Pak Med Assoc. 2012; 62(3): 226-31                                                                                                                                                                           |
| Stein Z, Belmont L, Durkin M. Mild mental retardation and severe mental retardation compared: experiences in eight less developed countries. Ups J Med Sci Suppl. 1987; 44: 89-96                                                                                                                                                                                    |
| Strickland G, Zafar-Latif A, Fox E, Kaliq A, Chowdhry M. Endemic malaria in four villages of the Pakistani province of Punjab. Trans R Soc Trop Med Hyg. 1987; 81(1): 36-41 as it appears in Malaria Atlas Project. Malaria Atlas Project Plasmodium Falciparum Parasite Rate Database. Oxford, United Kingdom: Malaria Atlas Project                                |
| Tebeu PM, Fomulu JN, Khaddaj S, de Bernis L, Delvaux T, Rochat CH. Risk factors for obstetric fistula: a clinical review. Int Urogynecol J. 2012; 23(4): 387-94                                                                                                                                                                                                      |
| U.S. Department of Agriculture (USDA). USDA Global Tobacco Database 1960-2005. Washington D.C. , United States: U.S. Department of Agriculture (USDA)                                                                                                                                                                                                                |

|                                                                                                                                                                                                                                                                                                                                                                                                                      |
|----------------------------------------------------------------------------------------------------------------------------------------------------------------------------------------------------------------------------------------------------------------------------------------------------------------------------------------------------------------------------------------------------------------------|
| United Nations Children's Fund (UNICEF), World Health Organization (WHO). WHO and UNICEF Reported Disease Incidence Time Series. Geneva, Switzerland: World Health Organization (WHO)                                                                                                                                                                                                                                |
| United Nations Office on Drugs and Crime (UNODC). Illicit Drug Trends in Pakistan. Vienna, Austria: United Nations Office on Drugs and Crime (UNODC), 2008                                                                                                                                                                                                                                                           |
| United Nations Office on Drugs and Crime (UNODC). World Drug Report 2012. Vienna, Austria: United Nations Office on Drugs and Crime (UNODC), 2012                                                                                                                                                                                                                                                                    |
| United Nations Statistics Division (UNSD). National Accounts Main Aggregates Database. New York City, United States of America: United Nations Statistics Division (UNSD)                                                                                                                                                                                                                                            |
| United Nations Statistics Division (UNSD). United Nations Demographic Yearbook 2014. New York, United States of America: United Nations (UN), 2015                                                                                                                                                                                                                                                                   |
| United States Renal Data System Coordinating Center. USRDS 2007 Annual Data Report: Atlas of Chronic Kidney Disease and End-Stage Renal Disease in the United States. Bethesda, United States: National Institute of Diabetes and Digestive and Kidney Diseases (NIDDK), National Institutes of Health, 2007                                                                                                         |
| US Geological Survey (USGS). United States Geological Survey Minerals Yearbook 2011. Reston, United States: US Geological Survey (USGS)                                                                                                                                                                                                                                                                              |
| Wahid S, Stresman GH, Kamal SS, Sepulveda N, Kleinschmidt I, Bousema T, Drakeley C. Heterogeneous malaria transmission in long-term Afghan refugee populations: a cross-sectional study in five refugee camps in northern Pakistan. Malar J. 2016; 15: 245 as it appears in Malaria Atlas Project. Malaria Atlas Project Plasmodium Falciparum Parasite Rate Database. Oxford, United Kingdom: Malaria Atlas Project |
| Weatherall D. Sickle Cell and Thalassemias Prevalence Data, Personal Correspondence with David Weatherall. [Unpublished]                                                                                                                                                                                                                                                                                             |
| World Bank. World Development Indicators - Hospital Beds (per 1,000 People). Washington DC, United States of America: World Bank                                                                                                                                                                                                                                                                                     |
| World Bank. World Development Indicators - Vitamin A Supplementation Coverage Rate. Washington DC, United States of America: World Bank                                                                                                                                                                                                                                                                              |
| World Health Organization (WHO). Global leprosy situation, 2004. Wkly Epidemiol Rec. 2005: 80(13): 118-24                                                                                                                                                                                                                                                                                                            |
| World Health Organization (WHO). Global leprosy situation, 2005. Wkly Epidemiol Rec. 2005: 80(34): 289-95                                                                                                                                                                                                                                                                                                            |
| World Health Organization (WHO). Global leprosy situation, 2006. Wkly Epidemiol Rec. 2006: 81(32): 309-16                                                                                                                                                                                                                                                                                                            |
| World Health Organization (WHO). Global leprosy situation, 2007. Wkly Epidemiol Rec. 2007: 82(25): 225-32                                                                                                                                                                                                                                                                                                            |
| World Health Organization (WHO). Global leprosy situation, 2009. Wkly Epidemiol Rec. 2009: 84(33): 333-40                                                                                                                                                                                                                                                                                                            |
| World Health Organization (WHO). Global leprosy situation, 2010. Wkly Epidemiol Rec. 2010: 85(35): 337-48                                                                                                                                                                                                                                                                                                            |
| World Health Organization (WHO). Global leprosy situation, 2012. Wkly Epidemiol Rec. 2012: 87(34): 317-28                                                                                                                                                                                                                                                                                                            |

|                                                                                                                                                                                     |
|-------------------------------------------------------------------------------------------------------------------------------------------------------------------------------------|
| World Health Organization (WHO). Global leprosy situation, beginning of 2008. Wkly Epidemiol Rec. 2008; 83(33): 293-300                                                             |
| World Health Organization (WHO). Global leprosy update, 2013; reducing disease burden. Wkly Epidemiol Rec. 2014; 89(36): 389-400                                                    |
| World Health Organization (WHO). Global leprosy update, 2014: need for early case detection. Wkly Epidemiol Rec. 2015; 90(36): 461-74                                               |
| World Health Organization (WHO). Global leprosy: update on the 2012 situation. Wkly Epidemiol Rec. 2013; 88(35): 365-79                                                             |
| World Health Organization (WHO). Global Status Report on Road Safety 2009. Geneva, Switzerland: World Health Organization (WHO), 2009                                               |
| World Health Organization (WHO). Leprosy update, 2011. Wkly Epidemiol Rec. 2011; 86(36): 389-99                                                                                     |
| World Health Organization (WHO). Pakistan WHO Leishmaniasis Country Profile 2001-2010. Geneva, Switzerland: World Health Organization (WHO)                                         |
| World Health Organization (WHO). Pakistan World Health Survey 2003-2004. Geneva, Switzerland: World Health Organization (WHO), 2005                                                 |
| World Health Organization (WHO). WHO Global Database on Child Growth and Malnutrition - Historical. Geneva, Switzerland: World Health Organization (WHO)                            |
| World Health Organization (WHO). WHO Global Database on Child Growth and Malnutrition. Geneva, Switzerland: World Health Organization (WHO)                                         |
| World Health Organization (WHO). WHO Global Database on Vitamin A Deficiency. Geneva, Switzerland: World Health Organization (WHO)                                                  |
| World Health Organization (WHO). WHO Global Health Expenditure Database. Geneva, Switzerland: World Health Organization (WHO)                                                       |
| World Health Organization (WHO). WHO Global Health Observatory - Cholera: Number of Reported Cases by Country. Geneva, Switzerland: World Health Organization (WHO)                 |
| World Health Organization (WHO). WHO Global Health Observatory - Population Living in Trachoma Endemic Areas. Geneva, Switzerland: World Health Organization (WHO)                  |
| World Health Organization (WHO). WHO Global Health Observatory - Recorded Alcohol Per Capita Consumption 1960-1979. Geneva, Switzerland: World Health Organization (WHO)            |
| World Health Organization (WHO). WHO Global Health Observatory - Recorded Alcohol Per Capita Consumption 1980-1999. Geneva, Switzerland: World Health Organization (WHO)            |
| World Health Organization (WHO). WHO Global Health Observatory - Recorded Alcohol Per Capita Consumption 2000-2009 by country. Geneva, Switzerland: World Health Organization (WHO) |
| World Health Organization (WHO). WHO Global Health Observatory - Visceral Leishmaniasis: Number of Reported Cases by Country. Geneva, Switzerland: World Health Organization (WHO)  |
| World Health Organization (WHO). WHO Household Energy Database 1974-2008. Geneva, Switzerland: World Health Organization (WHO), 2010                                                |
| World Health Organization (WHO). WHO PCT Databank - Soil-transmitted Helminthiases. Geneva, Switzerland: World Health Organization (WHO)                                            |

|                                                                                                                                                                                                                                                                                                                                |
|--------------------------------------------------------------------------------------------------------------------------------------------------------------------------------------------------------------------------------------------------------------------------------------------------------------------------------|
| World Health Organization (WHO). WHO Tuberculosis Case Notifications. Geneva, Switzerland: World Health Organization (WHO)                                                                                                                                                                                                     |
| Yakub M, Iqbal MP. Association of blood lead (Pb) and plasma homocysteine: a cross sectional survey in Karachi, Pakistan. PLoS One. 2010; 5(7): e11706                                                                                                                                                                         |
| Zafar J, Bhatti F, Akhtar N, Rasheed U, Bashir R, Humayun S, Waheed A, Younus F, Nazar M, Umaimato. Prevalence and risk factors for diabetes mellitus in a selected urban population of a city in Punjab. J Pak Med Assoc. 2011; 61(1): 40-7                                                                                   |
| Zuhaid M, Zahir KK, Diju IU. Knowledge and perceptions of diabetes in urban and semi urban population of Peshawar, Pakistan. J Ayub Med Coll Abbottabad. 2012; 24(1): 105-8                                                                                                                                                    |
| World Health Organization (WHO). Global leprosy update, 2015: time for action, accountability and inclusion. Wkly Epidemiol Rec. 2016; 92(35): 405–20                                                                                                                                                                          |
| Pakistan Bureau of Statistics. Pakistan Social and Living Standards Measurement Survey 2014-2015. Islamabad, Pakistan: Pakistan Bureau of Statistics, 2016                                                                                                                                                                     |
| Zafar S, Jean-Baptiste R, Rahman A, Neilson JP, van den Broek NR. Non-Life Threatening Maternal Morbidity: Cross Sectional Surveys from Malawi and Pakistan. PLoS One. 2015; 10(9): e0138026                                                                                                                                   |
| United Nations Population Division. Abortion Policies: A Global Review. New York, United States of America: United Nations (UN), 2002                                                                                                                                                                                          |
| United Nations Population Division. World Abortion Policies 2007. New York, United States of America: United Nations (UN), 2007                                                                                                                                                                                                |
| United Nations Population Division. World Abortion Policies 2013. New York, United States of America: United Nations (UN), 2013                                                                                                                                                                                                |
| Popova S, Lange S, Probst C, Gmel G, Rehm J, Centre for Addiction and Mental Health (Canada). Estimation of national, regional and global prevalence of alcohol use during pregnancy and fetal alcohol syndrome: a systematic review and meta-analysis. Lancet Glob Health. [Forthcoming]                                      |
| Bellizzi S, Ali MM, Abalos E, Betran AP, Kapila J, Pileggi-Castro C, Vogel JP, Merialdi M. Are hypertensive disorders in pregnancy associated with congenital malformations in offspring? Evidence from the WHO Multicountry cross sectional survey on maternal and newborn health. BMC Pregnancy Childbirth. 2016; 16(1): 198 |
| Memon ZA, Khan GN, Soofi SB. Impact of a community-based perinatal and newborn preventive care package on perinatal and neonatal mortality in a remote mountainous district in Northern Pakistan. BMC Pregnancy Childbirth. 2015; 15(106)                                                                                      |
| Saeed A, Butt ZA, Malik T. Investigation of measles outbreak in a district of Balochistan Province, Pakistan. J Ayub Med Coll Abbottabad. 2015; 27(4): 900-3                                                                                                                                                                   |
| Rizvi SF, Mustafa G, Kundi A, Khan MA. PREVALENCE OF CONGENITAL HEART DISEASE IN RURAL COMMUNITIES OF PAKISTAN. J Ayub Med Coll Abbottabad. 2015; 27(1): 124-7                                                                                                                                                                 |
| International Centre for Eye Health (ICEH). Pakistan - Chakwal Rapid Assessment of Avoidable Blindness 2000                                                                                                                                                                                                                    |
| International Centre for Eye Health (ICEH). Pakistan - Peshawar Rapid Assessment of Avoidable Blindness 2013. Grootebroek, Netherlands: RAAB Repository                                                                                                                                                                        |

|                                                                                                                                                                                                                                                                                                                           |
|---------------------------------------------------------------------------------------------------------------------------------------------------------------------------------------------------------------------------------------------------------------------------------------------------------------------------|
| Afridi SK, Malik FR, Khan MH, Ahmad SH. Prevalence of Blood Lead Levels (BLLs) in children visiting tertiary care hospitals of Peshawar from February to April 2015: A pilot study. <i>J Pak Med Assoc.</i> 2016; 66(10): 1350-1354                                                                                       |
| Sohaila A, Shafiq Y, Azim S, Baloch B, Akhtar AS, Tikmani SS, Brown N. Predictors and outcome of tetanus in newborns in slum areas of Karachi City: a case control study. <i>BMC Res Notes.</i> 2015; 8: 338                                                                                                              |
| Hopkins DR, Ruiz-Tiben E, Ruebush TK, Diallo N, Agle A, Withers PC Jr. Dracunculiasis eradication: delayed, not denied. <i>Am J Trop Med Hyg.</i> 2000; 62(2): 163-8                                                                                                                                                      |
| Munim S, Maheen H, Zainab G, Fatima S. Fetal outcome of cases with diaphragmatic hernia. <i>J Matern Fetal Neonatal Med.</i> 2013; 26(14): 1439-42                                                                                                                                                                        |
| World Health Organization (WHO). Dracunculiasis: Global Surveillance Summary, 1996. <i>Wkly Epidemiol Rec.</i> 1997; 19(72): 133-140                                                                                                                                                                                      |
| Euromonitor International. Euromonitor Passport - Fresh Foods Market Statistics. London, United Kingdom: Euromonitor International                                                                                                                                                                                        |
| Abdul Mujeeb S, Jamal Q, Khanani R, Iqbal N, Kaher S. Prevalence of hepatitis B surface antigen and HCV antibodies in hepatocellular carcinoma cases in Karachi, Pakistan. <i>Trop Doct.</i> 1997; 27: 45-6                                                                                                               |
| Butt AS, Hamid S, Wadalawala AA, Ghufuran M, Javed AA, Farooq O, Ahmed B, Ul Haq T, Jafri W. Hepatocellular carcinoma in Native South Asian Pakistani population; trends, clinicopathological characteristics & differences in viral marker negative & viral-hepatocellular carcinoma. <i>BMC Res Notes.</i> 2013; 6: 137 |
| Butt AK, Khan AA, Alam A, Ahmad S, Shah SW, Shafqat F, Naqvi AB. Hepatocellular carcinoma: analysis of 76 cases. <i>J Pak Med Assoc.</i> 1998; 48(7): 197-201                                                                                                                                                             |
| Gulnaz A, Sayyed AH, Amin F, Khan A ul H, Aslam MA, Shaikh RS, Ali M. Association of XRCC1, XRCC3, and XPD genetic polymorphism with an increased risk of hepatocellular carcinoma because of the hepatitis B and C virus. <i>Eur J Gastroenterol Hepatol.</i> 2013; 25(2): 166-79                                        |
| Idrees M, Rafique S, Rehman I, Akbar H, Yousaf M-Z, Butt S, Awan Z, Manzoor S, Akram M, Aftab M, Khubaib B, Riazuddin S. Hepatitis C virus genotype 3a infection and hepatocellular carcinoma: Pakistan experience. <i>World J Gastroenterol.</i> 2009; 15(40): 5080-5                                                    |
| Community-Based Management of Acute Malnutrition (CMAM) Forum. Putting Child Kwarshiorkor on the Map. Community-Based Management of Acute Malnutrition (CMAM) Forum, 2016                                                                                                                                                 |
| World Health Organization (WHO). WHO Global Health Observatory Interactive Graph - Number of Cases of Visceral Leishmaniasis Reported 2011. Geneva, Switzerland: World Health Organization (WHO)                                                                                                                          |
| World Health Organization (WHO). WHO Global Health Observatory Interactive Graph - Number of Cases of Visceral Leishmaniasis Reported 2012. Geneva, Switzerland: World Health Organization (WHO)                                                                                                                          |
| World Health Organization (WHO). WHO Global Health Observatory Interactive Graph - Number of Cases of Visceral Leishmaniasis Reported 2013. Geneva, Switzerland: World Health Organization (WHO)                                                                                                                          |

|                                                                                                                                                                                                                                                                                                                                                                                                                                |
|--------------------------------------------------------------------------------------------------------------------------------------------------------------------------------------------------------------------------------------------------------------------------------------------------------------------------------------------------------------------------------------------------------------------------------|
| World Health Organization (WHO). WHO Global Health Observatory Interactive Graph - Number of Cases of Visceral Leishmaniasis Reported 2014. Geneva, Switzerland: World Health Organization (WHO)                                                                                                                                                                                                                               |
| Emmanuel F, Blanchard J, Zaheer HA, Reza T, Holte-McKenzie M, HASP team. The HIV/AIDS Surveillance Project mapping approach: an innovative approach for mapping and size estimation for groups at a higher risk of HIV in Pakistan. <i>AIDS</i> . 2010; 24 Suppl 2: S77-84                                                                                                                                                     |
| Centers for Disease Control and Prevention (CDC). International Notes Update: Dracunculiasis Eradication Pakistan, 1990. <i>MMWR Morb Mortal Wkly Rep</i> . 1991; 40(1): 5-7                                                                                                                                                                                                                                                   |
| World Health Organization. Dracunculiasis: Global Surveillance Summary, 1994. <i>Wkly Epidemiol Rec</i> . 1993; 70(18): 125-131                                                                                                                                                                                                                                                                                                |
| ICF International, Ministry of National Health Services, Regulations & Coordination (Pakistan), National Institute of Population Studies (Pakistan). Pakistan Demographic and Health Survey 2017-2018. Fairfax, United States of America: ICF International, 2018                                                                                                                                                              |
| World Health Organization (WHO). WHO Mortality Database Version March 2017. Geneva, Switzerland: World Health Organization (WHO)                                                                                                                                                                                                                                                                                               |
| Pakistan Bureau of Statistics, United Nations Population Fund (UNFPA). Pakistan Population and Housing Census 2017                                                                                                                                                                                                                                                                                                             |
| World Health Organization (WHO). WHO Global Project on Anti-Tuberculosis Drug Resistance Surveillance Data 1988-2015                                                                                                                                                                                                                                                                                                           |
| Sharieff S, Burney IA, Ahmad N, Salam A, Siddiqui T. Radiological features of hepatocellular carcinoma in Southern Pakistan. <i>Trop Doct</i> . 2001; 31(4): 224-5                                                                                                                                                                                                                                                             |
| Smolak A, Chemaitelly H, Abu-Raddad LJ. The epidemiology of Chlamydia trachomatis in the Middle East and North Africa: systematic review and meta-analysis                                                                                                                                                                                                                                                                     |
| Gul F, Faiz NR, Raziq F, Malik L, Sherin A, Kazi BM, Bukhari, A. Frequency of vaginal discharge and its association with various sexually transmitted diseases in women attending antenatal clinic. <i>J Postgrad Med</i> . 2005; 19(1): 86-91 as it appears in Smolak A, Chemaitelly H, Abu-Raddad LJ. The epidemiology of Gonorrhoea in the Middle East and North Africa: systematic review and meta-analysis. [Forthcoming] |
| Wasti S, Ashfaq MK, Ishaq R, Hamid R. Prevalence of chlamydial infection in females attending antenatal and family planning clinics in Karachi Pakistan. <i>Aust N Z J Obstet Gynaecol</i> . 1997; 37(4): 462-5                                                                                                                                                                                                                |
| Ministry of National Health Services, Regulations & Coordination (Pakistan), Pakistan Health Research Council (PHRC). Pakistan STEPS Noncommunicable Disease Risk Factors Survey 2013-2014                                                                                                                                                                                                                                     |
| World Health Organization (WHO). WHO Global Health Observatory - Cholera: Number of Reported Deaths by Country. Geneva, Switzerland: World Health Organization (WHO)                                                                                                                                                                                                                                                           |
| International Road Federation. World Road Statistics 2009 Database and World Road Statistics 2007                                                                                                                                                                                                                                                                                                                              |
| BP. BP Statistical Review of World Energy 2016. London, United Kingdom: BP, 2016                                                                                                                                                                                                                                                                                                                                               |
| Pakistan Bureau of Statistics, Planning and Development Department, Government of Gilgit-Baltistan (Pakistan), United Nations Children's Fund (UNICEF). Pakistan - Gilgit-Baltistan                                                                                                                                                                                                                                            |

|                                                                                                                                                                                                                                                                                                     |
|-----------------------------------------------------------------------------------------------------------------------------------------------------------------------------------------------------------------------------------------------------------------------------------------------------|
| Multiple Indicator Cluster Survey 2016-2017. New York, United States of America: United Nations Children's Fund (UNICEF), 2020                                                                                                                                                                      |
| International Labour Organization (ILO). International Labour Organization Database (ILOSTAT) - Employment to Population Ratio by Sex and Age. International Labour Organization (ILO)                                                                                                              |
| Global Burden of Disease Collaborative Network. Global Burden of Disease Study 2016 (GBD 2016) Covariates 1980-2016. Seattle, United States of America: Institute for Health Metrics and Evaluation (IHME), 2017                                                                                    |
| Malaria Atlas Project. Malaria Atlas Project Annual Parasite Incidence Database                                                                                                                                                                                                                     |
| World Malaria Report 2015 as it appears in Malaria Atlas Project. Malaria Atlas Project Annual Parasite Incidence Database                                                                                                                                                                          |
| World Malaria Report 2016 as it appears in Malaria Atlas Project. Malaria Atlas Project Annual Parasite Incidence Database                                                                                                                                                                          |
| Junejo AA, Abbasi KA, Chand H, Abbasi S. Malaria in Children at Children Hospital Chandka Medical College Larkana. Med Channel. 2012; 18(1): 55–7 as it appears in Malaria Atlas Project. Malaria Atlas Project Annual Parasite Incidence Database                                                  |
| Yasinzai MI, Kakarsulemankhel JK. Incidence of Human Malaria Infection in Central Areas of Balochistan: Mastung and Khuzdar. Rawal Med J. 2007; 32(2): 176-8 as it appears in Malaria Atlas Project. Malaria Atlas Project Annual Parasite Incidence Database                                       |
| Yasinzai MI, Kakarsulemankhel JK. Incidence of human malaria infection in northern hilly region of Balochistan, adjoining with NWFP, Pakistan: district Zhob. Pak J Biol Sci. 2008; 11(12): 1620–4 as it appears in Malaria Atlas Project. Malaria Atlas Project Annual Parasite Incidence Database |
| Pakistan Malaria Annual Report 2015 as it appears in Malaria Atlas Project. Malaria Atlas Project Annual Parasite Incidence Database                                                                                                                                                                |
| Pakistan Malaria Annual Report 2016 as it appears in Malaria Atlas Project. Malaria Atlas Project Annual Parasite Incidence Database                                                                                                                                                                |
| Rowland M, Rab MA, Freeman T, Durrani N, Rehman N. Afghan refugees and the temporal and spatial distribution of malaria in Pakistan. Soc Sci Med. 2002; 55(11): 206172 as it appears in Malaria Atlas Project. Malaria Atlas Project Annual Parasite Incidence Database                             |
| Pakistan Presentation on World Malaria Day 2015 as it appears in Malaria Atlas Project. Malaria Atlas Project Annual Parasite Incidence Database                                                                                                                                                    |
| Pakistan Malaria Annual Report 2019 as it appears in Malaria Atlas Project. Malaria Atlas Project Annual Parasite Incidence Database                                                                                                                                                                |
| World Malaria Report 2019 as it appears in Malaria Atlas Project. Malaria Atlas Project Annual Parasite Incidence Database                                                                                                                                                                          |
| Nisar N, Abbasi RM, Chana SR, Rizwan N, Badar R. Maternal Mortality In Pakistan: Is There Any Metamorphosis Towards Betterment? J Ayub Med Coll Abbottabad. 2017; 29(1): 118-122                                                                                                                    |
| World Health Organization (WHO). Global leprosy update, 2016: accelerating reduction of disease burden. Wkly Epidemiol Rec. 2017; 92(35): 501-20                                                                                                                                                    |

|                                                                                                                                                                                                                                                                                                                     |
|---------------------------------------------------------------------------------------------------------------------------------------------------------------------------------------------------------------------------------------------------------------------------------------------------------------------|
| Herekar AA, Ahmad A, Uqaili UL, Ahmed B, Effendi J, Alvi SZ, Shahab MA, Javed U, Herekar AD, Khanani R, Steiner TJ. Primary headache disorders in the adult general population of Pakistan- a cross sectional nationwide prevalence survey. <i>J Headache Pain</i> . 2017; 18(1): 28                                |
| Food Fortification Initiative (United States), Global Alliance for Improved Nutrition (GAIN), Iodine Global Network (Canada), Micronutrient Forum (Canada). Global Fortification Data Exchange: Legislation and Standards, Year When Food Fortification Mandated, and Count of Nutrients In Fortification Standards |
| Ayaz A, Hasan Z, Jafri S, Inayat R, Mangi R, Channa AA, Malik FR, Ali A, Rafiq Y, Hasan R. Characterizing Mycobacterium tuberculosis isolates from Karachi, Pakistan: drug resistance and genotypes. <i>Int J Infect Dis</i> . 2012; 16(4): e303-309                                                                |
| Tanveer M, Hasan Z, Siddiqui AR, Ali A, Kanji A, Ghebremicheal S, Hasan R. Genotyping and drug resistance patterns of M. tuberculosis strains in Pakistan. <i>BMC Infect Dis</i> . 2008; 8: 171                                                                                                                     |
| Shakoor S, Tanveer M, Rafiq Y, Hasan Z, Javed A, Rizvi N, Rehman N, Hasan R. Prevalence of ST26 among untreated smear-positive tuberculosis patients from Karachi indicating ongoing transmission. <i>Scand J Infect Dis</i> . 2009; 41(10): 714–9                                                                  |
| ReliefWeb. Pakistan: Dengue Outbreak - Sep 2017. New York City, United States of America: ReliefWeb, 2017                                                                                                                                                                                                           |
| Rehman A, Siddiqui TS, Idris M. Clinical Outcome in Measles Patients Hospitalized With Complications. <i>J Ayub Med Coll Abbottabad</i> . 2008; 20(2): 14–6                                                                                                                                                         |
| Karvonen M, Viik-Kajander M, Moltchanova E, Libman I, LaPorte R, Tuomilehto J. Incidence of childhood type 1 diabetes worldwide. Diabetes Mondiale (DiaMond) Project Group. <i>Diabetes Care</i> . 2000; 23(10): 1516–26                                                                                            |
| World Health Organization (WHO). WHO International Travel and Health, Annex 1, Countries With Risk of Yellow Fever Transmission and Countries Requiring Yellow Fever Vaccination 2017 Update. Geneva, Switzerland: World Health Organization (WHO), 2017                                                            |
| Gallup. Pakistan World Poll 2007                                                                                                                                                                                                                                                                                    |
| Gallup. Pakistan World Poll 2011                                                                                                                                                                                                                                                                                    |
| Gallup. Pakistan World Poll 2012                                                                                                                                                                                                                                                                                    |
| Sami E, Vichayanrat T, Satitvipawee P. Caries with Dental Fluorosis and Oral Health Behaviour Among 12-Year School Children in Moderate-Fluoride Drinking Water Community in Quetta, Pakistan. <i>J Coll Physicians Surg Pak</i> . 2016; 26(9): 744–7                                                               |
| World Health Organization (WHO). Global Status Report on Road Safety 2013. Geneva, Switzerland: World Health Organization (WHO), 2013                                                                                                                                                                               |
| World Health Organization (WHO). Global Status Report on Road Safety 2015. Geneva, Switzerland: World Health Organization (WHO), 2015                                                                                                                                                                               |
| Centers for Disease Control and Prevention (CDC), Ministry of National Health Services, Regulations & Coordination (Pakistan), World Health Organization (WHO). Pakistan Global Youth Tobacco Survey 2013. Atlanta, United States of America: Centers for Disease Control and Prevention (CDC)                      |
| Nisar MI, Ilyas M, Naeem K, Fatima U, Jehan F. Cause of Death in under 5 Children in a Demographic Surveillance Site in Pakistan. <i>Online J Public Health Inform</i> . 2017; 9(1): e174                                                                                                                           |



|                                                                                                                                                                                                                                                                                                                                                                                                                                                                                                                   |
|-------------------------------------------------------------------------------------------------------------------------------------------------------------------------------------------------------------------------------------------------------------------------------------------------------------------------------------------------------------------------------------------------------------------------------------------------------------------------------------------------------------------|
| World Health Organization (WHO). Monthly Report on Dracunculiasis Cases, January-December 2017. WHO Wkly Epidemiol Rec. 2018; 93(6): 45-60                                                                                                                                                                                                                                                                                                                                                                        |
| World Health Organization Regional Office for the Eastern Mediterranean (EMRO-WHO). EMRO-WHO Weekly Epidemiological Monitor Issue 53, 31 December 2017. Cairo, Egypt: World Health Organization Regional Office for the Eastern Mediterranean (EMRO-WHO), 2017                                                                                                                                                                                                                                                    |
| World Health Organization Regional Office for the Eastern Mediterranean (EMRO-WHO). WHO EMRO Health topics: Zika virus. Cairo, Egypt: World Health Organization Regional Office for the Eastern Mediterranean (EMRO-WHO)                                                                                                                                                                                                                                                                                          |
| Ahmad I, Khan B, Khan S, Khan MT, Schwab AP. Assessment of lead exposure among automobile technicians in Khyber Pakhtunkhwa, Pakistan. Sci Total Environ. 2018; 633: 293-299                                                                                                                                                                                                                                                                                                                                      |
| International Fuel Quality Center (IFQC). Overview of Leaded Gasoline and Sulfur Levels in Gasoline and Diesel . 2002                                                                                                                                                                                                                                                                                                                                                                                             |
| Global Burden of Disease Collaborative Network. Global Burden of Disease Study 2017 (GBD 2017) Cause-Specific Mortality 1980-2017. Seattle, United States of America: Institute for Health Metrics and Evaluation (IHME), 2018                                                                                                                                                                                                                                                                                    |
| World Health Organization (WHO). WHO Global Health Observatory - Hospital Bed Density Data by Country. Geneva, Switzerland: World Health Organization (WHO)                                                                                                                                                                                                                                                                                                                                                       |
| World Health Organization (WHO). Global leprosy update, 2017: reducing the disease burden due to leprosy. Wkly Epidemiol Rec. 2018; 93(35): 445-56                                                                                                                                                                                                                                                                                                                                                                |
| World Health Organization Regional Office for the Eastern Mediterranean (EMRO-WHO). EMRO-WHO Weekly Epidemiological Monitor Issue 43, 22 October 2017. Cairo, Egypt: World Health Organization Regional Office for the Eastern Mediterranean (EMRO-WHO), 2017                                                                                                                                                                                                                                                     |
| Lear SA, Hu W, Rangarajan S, Gasevic D, Leong D, Iqbal R, Casanova A, Swaminathan S, Anjana RM, Kumar R, Rosengren A, Wei L, Yang W, Chuangshi W, Huaxing L, Nair S, Diaz R, Swidon H, Gupta R, Mohammadifard N, Lopez-Jaramillo P, Oguz A, Zatonska K, Seron P, Avezum A, Poirier P, Teo K, Yusuf S. The effect of physical activity on mortality and cardiovascular disease in 130 000 people from 17 high-income, middle-income, and low-income countries: the PURE study. Lancet. 2017; 390(10113): 2643-2654 |
| National Institute of Population Studies (Pakistan). Pakistan - Azad Jammu and Kashmir Demographic and Health Survey 2010. Islamabad, Pakistan: National Institute of Population Studies (Pakistan), 2011                                                                                                                                                                                                                                                                                                         |
| World Health Organization Regional Office for the Eastern Mediterranean (EMRO-WHO). EMRO-WHO Weekly Epidemiological Monitor Issue 52, 29 December 2013. Cairo, Egypt: World Health Organization Regional Office for the Eastern Mediterranean (EMRO-WHO), 2013                                                                                                                                                                                                                                                    |
| Rasheed SB, Butlin RK, Boots M. A review of dengue as an emerging disease in Pakistan. Public Health. 2013; 127(1): 11-7                                                                                                                                                                                                                                                                                                                                                                                          |
| Khanani M, Arif A, Shaikh R. Dengue in Pakistan: Journey from a disease free to a hyper endemic nation. J Dow Univ Health Sci. 2011; 5(3): 81-4                                                                                                                                                                                                                                                                                                                                                                   |
| Yousaf MZ, Siddique A, Ashfaq UA, Ali M. Scenario of dengue infection & its control in Pakistan: An up—date and way forward. Asian Pac J Trop Med. 2018; 11(1): 15-23                                                                                                                                                                                                                                                                                                                                             |

|                                                                                                                                                                                                                                                                                                     |
|-----------------------------------------------------------------------------------------------------------------------------------------------------------------------------------------------------------------------------------------------------------------------------------------------------|
| Bureau of Statistics Punjab (Pakistan), United Nations Children's Fund (UNICEF). Pakistan - Punjab Multiple Indicator Cluster Survey 2017-2018. New York, United States of America: United Nations Children's Fund (UNICEF), 2019                                                                   |
| World Health Organization (WHO). Global Status Report on Road Safety 2018. Geneva, Switzerland: World Health Organization (WHO), 2018                                                                                                                                                               |
| Soofi S, Cousens S, Iqbal SP, Akhund T, Khan J, Ahmed I, Zaidi AK, Bhutta ZA. Effect of provision of daily zinc and iron with several micronutrients on growth and morbidity among young children in Pakistan: a cluster-randomised trial. <i>Lancet</i> . 2013; 382(9886): 29-40                   |
| United Nations Children's Fund (UNICEF). UNICEF State of the World's Children 2017. New York, United States: United Nations Children's Fund (UNICEF), 2017                                                                                                                                          |
| Gallup. Gallup Analytics - World Poll Negative Experience Index. Washington, D.C., United States of America: Gallup, 2019                                                                                                                                                                           |
| Pakistan World Poll 2015 as it appears in Gallup. Gallup Analytics - World Poll Negative Experience Index. Washington, D.C., United States of America: Gallup, 2019                                                                                                                                 |
| Pakistan World Poll 2016 as it appears in Gallup. Gallup Analytics - World Poll Negative Experience Index. Washington, D.C., United States of America: Gallup, 2019                                                                                                                                 |
| Pakistan World Poll 2017 as it appears in Gallup. Gallup Analytics - World Poll Negative Experience Index. Washington, D.C., United States of America: Gallup, 2019                                                                                                                                 |
| Pakistan World Poll 2008 as it appears in Gallup. Gallup Analytics - World Poll Negative Experience Index. Washington, D.C., United States of America: Gallup, 2019                                                                                                                                 |
| Pakistan World Poll 2009 as it appears in Gallup. Gallup Analytics - World Poll Negative Experience Index. Washington, D.C., United States of America: Gallup, 2019                                                                                                                                 |
| Pakistan World Poll 2010 as it appears in Gallup. Gallup Analytics - World Poll Negative Experience Index. Washington, D.C., United States of America: Gallup, 2019                                                                                                                                 |
| Pakistan World Poll 2013 as it appears in Gallup. Gallup Analytics - World Poll Negative Experience Index. Washington, D.C., United States of America: Gallup, 2019                                                                                                                                 |
| Pakistan World Poll 2014 as it appears in Gallup. Gallup Analytics - World Poll Negative Experience Index. Washington, D.C., United States of America: Gallup, 2019                                                                                                                                 |
| Pakistan World Poll 2018 as it appears in Gallup. Gallup Analytics - World Poll Negative Experience Index. Washington, D.C., United States of America: Gallup, 2019                                                                                                                                 |
| International Road Federation. World Road Statistics 2018. Geneva, Switzerland: International Road Federation, 2018                                                                                                                                                                                 |
| United Nations Children's Fund (UNICEF), World Health Organization (WHO). WHO and UNICEF Reported Official Target Population, Number of Doses Administered and Official Coverage 1966-2018. Geneva, Switzerland: World Health Organization (WHO), 2019                                              |
| Rehman IU, Bukhsh A, Khan TM. Measles in Pakistan: Time to make steps towards eradication. <i>Travel Med Infect Dis</i> . 2017; 18: 67-69                                                                                                                                                           |
| Khan NU, Ali I, Ahmad NU, Iqbal A, Rehman LU, Munir I, Rehman MU, Khan S, Ali S, Siddique L, Swati ZA. Prevalence of active HCV infection among the blood donors of Khyber Pakhtunkwa and FATA region of Pakistan and evaluation of the screening tests for anti-HCV. <i>Virol J</i> . 2011; 8: 154 |

|                                                                                                                                                                                                                                                                                                                                                      |
|------------------------------------------------------------------------------------------------------------------------------------------------------------------------------------------------------------------------------------------------------------------------------------------------------------------------------------------------------|
| Malaria Atlas Project. Sickle Haemoglobin (Hbs) Allele Frequency Layer. Oxford, United Kingdom: Malaria Atlas Project, 2013                                                                                                                                                                                                                          |
| World Health Organization (WHO). WHO Distribution of Measles Cases by Country and by Month 2011-2020                                                                                                                                                                                                                                                 |
| Euromonitor International. Euromonitor Passport - Smoking Tobacco Statistics. London, United Kingdom: Euromonitor International                                                                                                                                                                                                                      |
| Euromonitor International. Euromonitor Passport - Alcoholic Drinks Statistics. London, United Kingdom: Euromonitor International                                                                                                                                                                                                                     |
| Shaddick G, Thomas ML. Particulate Matter 2.5 and 10 Surface Monitor Station Expanded Database 2008-2017. [Unpublished]                                                                                                                                                                                                                              |
| Khwaja HA, Fatmi Z, Malashock D, Aminov Z, Kazi A, Siddique A, Qureshi J, Carpenter DO. Effect of air pollution on daily morbidity in Karachi, Pakistan. J Local Glob Health Sci. 2012; 3 as it appears in Shaddick G, Thomas ML. Particulate Matter 2.5 and 10 Surface Monitor Station Expanded Database 2008-2017. [Unpublished]                   |
| Alam K, Blaschke T, Madl P, Mukhtar A, Hussain M, Trautmann T, Rahman S. Aerosol size distribution and mass concentration measurements in various cities of Pakistan. J Environ Monit. 2011; 13(7): 1944-52 as it appears in Shaddick G, Thomas ML. Particulate Matter 2.5 and 10 Surface Monitor Station Expanded Database 2008-2017. [Unpublished] |
| Rasheed A, Aneja VP, Aiyyer A, Rafique U. Measurements and analysis of air quality in Islamabad, Pakistan. Earth's Future. 2014; 2 as it appears in Shaddick G, Thomas ML. Particulate Matter 2.5 and 10 Surface Monitor Station Expanded Database 2008-2017. [Unpublished]                                                                          |
| Niaz Y, Zhou J, Nasir A, Iqbal M, Dong B. Comparative study of particulate matter (PM10 and PM2.5) in Dalian-China and Faisalabad-Pakistan. Pak J Agric Sci. 2016; 53(1): 97-106 as it appears in Shaddick G, Thomas ML. Particulate Matter 2.5 and 10 Surface Monitor Station Expanded Database 2008-2017. [Unpublished]                            |
| World Health Organization (WHO). Protection At Birth (PAB) Against Tetanus with Tetanus Toxoid 1980-2017. Geneva, Switzerland: World Health Organization (WHO)                                                                                                                                                                                       |
| United Nations Children's Fund (UNICEF). UNICEF Maternal and Newborn Health Coverage Database as of November 2019. New York, United States of America: United Nations Children's Fund (UNICEF), 2019                                                                                                                                                 |
| Global Burden of Disease Collaborative Network. Global Health Spending 1995-2017. Seattle, United States of America: Institute for Health Metrics and Evaluation (IHME), 2020                                                                                                                                                                        |
| International Road Federation. World Road Statistics 2019. Geneva, Switzerland: International Road Federation, 2019                                                                                                                                                                                                                                  |
| Feenstra, Robert C., Robert Inklaar and Marcel P. Timmer (2015), "The Next Generation of the Penn World Table" American Economic Review, 105(10), 3150-3182, available for download at <a href="http://www.ggdc.net/pwt">www.ggdc.net/pwt</a>                                                                                                        |
| Maddison Project Database, version 2018. Bolt, Jutta, Robert Inklaar, Herman de Jong and Jan Luiten van Zanden (2018), "Rebasing 'Maddison': new income comparisons and the shape of long-run economic development", Maddison Project Working paper 10                                                                                               |
| World Bank. World Development Indicators - Gross Domestic Product (GDP). Washington DC, United States of America: World Bank                                                                                                                                                                                                                         |

|                                                                                                                                                                                                                                                                                                                                                                 |
|-----------------------------------------------------------------------------------------------------------------------------------------------------------------------------------------------------------------------------------------------------------------------------------------------------------------------------------------------------------------|
| United Nations Environment Programme. Leaded Petrol Phase-out: Global Status, March 2018. Nairobi, Kenya: United Nations Environment Programme                                                                                                                                                                                                                  |
| Buist AS, McBurnie MA, Vollmer WM, Gillespie S, Burney P, Mannino DM, Menezes AM, Sullivan SD, Lee TA, Weiss KB, Jensen RL, Marks GB, Gulsvik A, Nizankowska-Mogilnicka E, BOLD Collaborative Research Group. International variation in the prevalence of COPD (the BOLD Study): a population-based prevalence study. <i>Lancet</i> . 2007; 9589(9589): 741-50 |
| Rafique M, Rahman S, Rahman SU, Jabeen S, Shahzad MI, Rathore MH, Matiullah. Indoor radon concentration measurement in the dwellings of district Poonch (Azad Kashmir), Pakistan. <i>Radiat Prot Dosimetry</i> . 2010; 138(2): 158-65                                                                                                                           |
| Pakistan Priority Disease Report 2005-2006 as it appears in Malaria Atlas Project. Malaria Atlas Project Annual Parasite Incidence Database                                                                                                                                                                                                                     |
| Nigeria Annual Abstract of Statistics 2008 as it appears in Malaria Atlas Project. Malaria Atlas Project Annual Parasite Incidence Database                                                                                                                                                                                                                     |
| Pakistan Province Wise Comparison of Confirmed Malaria Cases 2009-2015 as it appears in Malaria Atlas Project. Malaria Atlas Project Annual Parasite Incidence Database                                                                                                                                                                                         |
| Kakar Q, Khan MA, Bile KM. Malaria control in Pakistan: new tools at hand but challenging epidemiological realities. <i>East Mediterr Health J</i> . 2010; 16 Suppl: S54-60 as it appears in Malaria Atlas Project. Malaria Atlas Project Annual Parasite Incidence Database                                                                                    |
| World Health Organization Regional Office for the Eastern Mediterranean (EMRO-WHO). EMRO-WHO Weekly Epidemiological Monitor Issue 36, 03 September 2017. Cairo, Egypt: World Health Organization Regional Office for the Eastern Mediterranean (EMRO-WHO), 2017                                                                                                 |
| Azad Government of the State of Jammu and Kashmir (Pakistan), Federal Bureau of Statistics (Pakistan), Government of Pakistan, Pakistan Bureau of Statistics, United Nations Children's Fund (UNICEF), University of Azad Jammu & Kashmir (Pakistan). Pakistan - Azad Jammu and Kashmir Multiple Indicator Cluster Survey 2007-2008                             |
| Institute for Health Metrics and Evaluation (IHME). IHME GBD Visceral Leishmaniasis Subnational Proportions Data                                                                                                                                                                                                                                                |
| Aga Khan University, Ministry of National Health Services, Regulations & Coordination (Pakistan), Pakistan Medical Research Council, UK Aid Direct, United Nations Children's Fund (UNICEF). Pakistan National Nutrition Survey 2018-2019                                                                                                                       |
| European Centre for Medium-Range Weather Forecasts (ECMWF). European Reanalysis-5. United Kingdom: European Centre for Medium-Range Weather Forecasts (ECMWF)                                                                                                                                                                                                   |
| Shera AS, Rafique G, Khawaja IA, Baqai S, King H. Pakistan National Diabetes Survey: prevalence of glucose intolerance and associated factors in Baluchistan province. <i>Diabetes Res Clin Pract</i> . 1999; 44(1): 49-58                                                                                                                                      |
| Durrani AB, Rana AB, Siddiqi HS, Marwat BU. The Spectrum of Chronic Liver Disease in Balochistan. <i>J Coll Physicians Surg Pak</i> . 2001; 11(2): 95-7                                                                                                                                                                                                         |
| Tareen S, Eslick GD, Kam EPY, Byles JE, Durrani AB, Maree SM. High prevalence of hepatitis B virus (HBV) among male blood donors in a developing country: urgent need for systematic screening. <i>Scand J Infect Dis</i> . 2002; 34(9): 712-3                                                                                                                  |
| Bureau of Statistics, Government of Balochistan (Pakistan), Federal Bureau of Statistics (Pakistan), Government of Balochistan (Pakistan), Planning and Development Department,                                                                                                                                                                                 |

|                                                                                                                                                                                                                                                        |
|--------------------------------------------------------------------------------------------------------------------------------------------------------------------------------------------------------------------------------------------------------|
| Government of Balochistan (Pakistan), United Nations Children's Fund (UNICEF). Pakistan - Balochistan Multiple Indicator Cluster Survey 2003-2004                                                                                                      |
| Paul RE, Patel AY, Mirza S, Fisher-Hoch SP, Luby SP. Expansion of epidemic dengue viral infections to Pakistan. <i>Int J Infect Dis.</i> 1998; 2(4): 197-201                                                                                           |
| Centers for Disease Control and Prevention (CDC) and World Health Organization (WHO). Pakistan-Islamabad Global Youth Tobacco Survey 2003. United States: Centers for Disease Control and Prevention (CDC), 2003                                       |
| Farooqi A, Gibson T. Prevalence of the major rheumatic disorders in the adult population of north Pakistan. <i>Br J Rheumatol.</i> 1998; 37(5): 491-5                                                                                                  |
| Lai CK, Beasley R, Crane J, Foliaki S, Shah J, Weiland S. Global variation in the prevalence and severity of asthma symptoms: phase three of the International Study of Asthma and Allergies in Childhood (ISAAC). <i>Thorax.</i> 2009; 64(6): 476-483 |
| Pal SA, Dennerstein L, Lehert P. Premenstrual symptoms in Pakistani women and their effect on activities of daily life. <i>J Pak Med Assoc.</i> 2011; 61(8): 763-8                                                                                     |
| Khokhar N. Spectrum of chronic liver disease in a tertiary care hospital. <i>J Pak Med Assoc.</i> 2002; 52(2): 56-8                                                                                                                                    |
| Qazi SA, Khan MA, Mughal N, Ahmad M, Joomro B, Sakata Y, Kuriya N, Matsuishi T, Abbas KA, Yamashita F. Dexamethasone and bacterial meningitis in Pakistan. <i>Arch Dis Child.</i> 1996; 75(6): 482-8                                                   |
| Rahman SU, Anwar J, Matiullah. Measurement of indoor radon concentration levels in Islamabad, Pakistan. <i>Radiat Meas.</i> 2008; S401-S404                                                                                                            |
| Bashir U, Nisar N, Arshad Y, Alam MM, Ashraf A, Sadia H, Kazi BM, Zaidi SSZ. Respiratory syncytial virus and influenza are the key viral pathogens in children                                                                                         |
| Jahan F. Dengue Fever (DF) in Pakistan. <i>Asia Pac Fam Med.</i> 2011; 10(1): 1                                                                                                                                                                        |
| Tabassum S, Afridi B, Aman Z, Tabassum W, Durrani R. Premenstrual syndrome: frequency and severity in young college girls. <i>J Pak Med Assoc.</i> 2005; 55(12): 546-9                                                                                 |
| Ahmad K, Khan MD, Qureshi MB, Munami S, Shah RA, Rasheed H, Jamali B, Baluch A, Khan MA. Prevalence and causes of blindness and low vision in a rural setting in Pakistan. <i>Ophthalmic Epidemiol.</i> 2005; 12(1): 19-23                             |
| Mashud I, Khan H, Khattak AM. Relative frequency of hepatitis B and C viruses in patients with hepatic cirrhosis at DHQ Teaching Hospital D. I. Khan. <i>J Ayub Med Coll Abbottabad.</i> 2004; 16(1): 32-4                                             |
| Mumford DB, Nazir M, Jilani FU, Baig IY. Stress and psychiatric disorder in the Hindu Kush: a community survey of mountain villages in Chitral, Pakistan. <i>Br J Psychiatry.</i> 1996; 168(3): 299-307                                                |
| Mufti KA, Said S, Farooq S, Haroon A, Nazeer A, Naeem S, Hussain I. Five year follow up of 100 heroin addicts in Peshawar. <i>J Ayub Med Coll Abbottabad.</i> 2004; 16(3): 5-9                                                                         |
| Ali A, Ahmad H, Ali I, Khan S, Zaidi G, Idrees M. Prevalence of active hepatitis c virus infection in district Mansehra Pakistan. <i>Virology.</i> 2010; 7(1): 334                                                                                     |
| Saha N, Ramzan M, Tay JS, Low PS, Basair JB, Khan FM. Molecular characterisation of red cell glucose-6-phosphate dehydrogenase deficiency in north-west Pakistan. <i>Hum Hered.</i> 1994; 44(2): 85-9                                                  |

|                                                                                                                                                                                                                                                                                               |
|-----------------------------------------------------------------------------------------------------------------------------------------------------------------------------------------------------------------------------------------------------------------------------------------------|
| Paracha PI, Hameed A, Simon J, Jamil A, Nawab G. Prevalence of anaemia in semi-urban areas of Peshawar, Pakistan: a challenge for health professionals and policy makers. <i>J Pak Med Assoc.</i> 1997; 47(2): 49-53                                                                          |
| Rahman S, Matiullah, Ghauri BM. Comparison of seasonal and yearly average indoor radon levels using CR-39 detectors. <i>Radiat Meas.</i> 2010; 45(2): 247-52                                                                                                                                  |
| Rahman S, Matiullah, Rahman Z, Mati N, Ghauri BM. Measurement of indoor radon levels in North West Frontier Province and federally administered tribal areas-Pakistan during summer. <i>Radiat Meas.</i> 2007; 42(2): 304-10                                                                  |
| Khan P, Ahmad A, Muhammad N, Khan TM, Ahmad B. Screening of 110 cirrhotic patients for hepatitis B and C at Saidu Teaching Hospital Saidu Sharif Swat. <i>J Ayub Med Coll Abbottabad.</i> 2009; 21(1): 119-21                                                                                 |
| Attaullah S, Khan S, Khan J. Trend of transfusion transmitted infections frequency in blood donors: provide a road map for its prevention and control. <i>J Transl Med.</i> 2012; 10(20)                                                                                                      |
| Shah SA, Marwat SA, Rashid HU, Hussain A, Khurshid K, Ahmad S. Importance of microscopic stool examination in patients with diarrhoea. <i>J Ayub Med Coll Abbottabad.</i> 2014; 26(4): 478-80                                                                                                 |
| Shera AS, Basit A, Fawwad A, Hakeem R, Ahmedani MY, Hydrie MZI, Khwaja IA. Pakistan National Diabetes Survey: prevalence of glucose intolerance and associated factors in the Punjab Province of Pakistan. <i>Prim Care Diabetes.</i> 2010; 4(2): 79–83                                       |
| London School of Hygiene and Tropical Medicine. <i>Global Atlas of Helminth Infections - Soil Transmitted Helminths.</i> London, United Kingdom: London School of Hygiene and Tropical Medicine                                                                                               |
| Khan S, Nabi G, Naeem M, Ali L, Silburn PA, Mellick GD. A door-to-door survey to estimate the prevalence of Parkinsonism in Pakistan. <i>Neuropsychiatr Dis Treat.</i> 2016; 12: 1499-506                                                                                                     |
| Akhtar T, Ullah Z, Khan MH, Nazli R. Chronic bronchitis in women using solid biomass fuel in rural Peshawar, Pakistan. <i>Chest.</i> 2007; 132(5): 1472–5                                                                                                                                     |
| World Health Organization Regional Office for the Eastern Mediterranean (EMRO-WHO). <i>Emerging Infectious Disease Outbreaks Reported in the Eastern Mediterranean Region in 2017.</i> Cairo, Egypt: World Health Organization Regional Office for the Eastern Mediterranean (EMRO-WHO), 2018 |
| World Health Organization Regional Office for the Eastern Mediterranean (EMRO-WHO). <i>EMRO-WHO Weekly Epidemiological Monitor Issue 46, 12 November 2017.</i> Cairo, Egypt: World Health Organization Regional Office for the Eastern Mediterranean (EMRO-WHO), 2017                         |
| Suleman M, Faryal R, Alam MM, Zaidi SSZ. Demographic characteristics of dengue virus outbreaks in Khyber Pakhtunkhwa province, Pakistan during 2003-2015. <i>J Formos Med Assoc.</i> 2017; 116(9): 727-729                                                                                    |
| Wasim A, Kazi AN, Hussain SA. 2013: rise of the deadly dengue fever in Pakistan. <i>J Infect Public Health.</i> 2014; 7(5): 453-4                                                                                                                                                             |
| Hopkins DR, Azam M, Ruiz-Tiben E, Kappus KD. Eradication of dracunculiasis from Pakistan. <i>Lancet.</i> 1995; 346(8975): 621-4                                                                                                                                                               |

|                                                                                                                                                                                                                                                                       |
|-----------------------------------------------------------------------------------------------------------------------------------------------------------------------------------------------------------------------------------------------------------------------|
| Ahmad A, Ahmad B, Ali A, et al. Seroprevalence of HBsAg and anti-HCV in general healthy population of Swat district with frequency of different HCV genotypes. <i>Pak J Med Sci.</i> 2009; 25(5): 744-748                                                             |
| Pakistan Rapid Assessment of Refractive Error Survey 2002-2004                                                                                                                                                                                                        |
| Sufia S, Chaudhry S, Izhar F, Syed A, Mirza BA, Khan AA. Dental caries experience in preschool children: is it related to a child's place of residence and family income? <i>Oral Health Prev Dent.</i> 2011; 9(4): 375-9                                             |
| Mahmud A, Jalil F, Karlberg J, Lindblad BS. Early child health in Lahore, Pakistan: VII. Diarrhoea. <i>Acta Paediatr Suppl.</i> 1993; 79-85                                                                                                                           |
| Malik MA, Akram RM, Tarar MA, Sultan A. Childhood epilepsy. <i>J Coll Physicians Surg Pak.</i> 2011; 21(2): 74-8                                                                                                                                                      |
| Bukhtiar N, Hussain T, Iqbal M, Malik AM, Qureshi AH, Hussain A. Hepatitis B and C single and co-infection in chronic liver disease and their effect on the disease pattern. <i>J Pak Med Assoc.</i> 2003; 53(4): 136-40                                              |
| Khokhar N, Asif N, Khokhar O. Hepatitis C virus Serotypes in chronic liver disease. <i>Pak J Med Sci.</i> 2002; 18(2): 156-9                                                                                                                                          |
| Mumford DB, Minhas FA, Akhtar I, Akhter S, Mubbashar MH. Stress and psychiatric disorder in urban Rawalpindi. Community survey. <i>Br J Psychiatry.</i> 2000; 557-62                                                                                                  |
| Mumford DB, Saeed K, Ahmad I, Latif S, Mubbashar MH. Stress and psychiatric disorder in rural Punjab. A community survey. <i>Br J Psychiatry.</i> 1997; 473-8                                                                                                         |
| Ali N, Anwar M, Ayyub M, Bhatti FA, Nadeem M, Nadeem A. Frequency of glucose-6-phosphate dehydrogenase deficiency in some ethnic groups of Pakistan. <i>J Coll Physicians Surg Pak.</i> 2005; 15(3): 137-41                                                           |
| Butt T, Ahmad RN, Salman M, Kazmi SY. Changing trends in drug resistance among typhoid salmonellae in Rawalpindi, Pakistan. <i>East Mediterr Health J.</i> 2005; 11(5-6): 1038-44                                                                                     |
| Luby SP, Agboatwalla M, Bowen A, Kenah E, Sharker Y, Hoekstra RM. Difficulties in maintaining improved handwashing behavior, Karachi, Pakistan. <i>Am J Trop Med Hyg.</i> 2009; 81(1): 140-5                                                                          |
| Hassan K, Hayat A, Khan U, Ikram N, Dodhy M, Afghan R, Tahir M. Reference values of hematological parameters in full term normal neonates in Rawalpindi and Islamabad. <i>Pak J Obstet Gynecol.</i> 1994; 29-31                                                       |
| Aslam M, Aslam J, Mitchell BD, Munir KM. Association between smallpox vaccination and hepatitis C antibody positive serology in Pakistani volunteers. <i>J Clin Gastroenterol.</i> 2005; 39(3): 243-6                                                                 |
| Khan NR, Sadiq F. Prenatal screening for hepatitis B virus. <i>Int J Gynaecol Obstet.</i> 1996; 55(1): 79-80                                                                                                                                                          |
| Luby SP, Qamruddin K, Shah AA, Omair A, Pahsa O, Khan AJ, McCormick JB, Hoodbhoy F, Fisher-Hoch S. The relationship between therapeutic injections and high prevalence of hepatitis C infection in Hafizabad, Pakistan. <i>Epidemiol Infect.</i> 1997; 119(3): 349-56 |
| Sultan F, Mehmood T, Mahmood MT. Infectious pathogens in volunteer and replacement blood donors in Pakistan: a ten-year experience. <i>Int J Infect Dis.</i> 2007; 11(5): 407-12                                                                                      |

|                                                                                                                                                                                                                                                                                                                                                                                                                    |
|--------------------------------------------------------------------------------------------------------------------------------------------------------------------------------------------------------------------------------------------------------------------------------------------------------------------------------------------------------------------------------------------------------------------|
| Faheem M, Mati N, Matiullah. Seasonal variation in indoor radon concentrations in dwellings in six districts of the Punjab province, Pakistan. <i>J Radiol Prot.</i> 2007; 27(4): 493-500                                                                                                                                                                                                                          |
| Faheem M, Matiullah X. Indoor radon concentration levels in several districts of the Punjab Province-Pakistan. <i>Radiat Meas.</i> 2008; S380-S384                                                                                                                                                                                                                                                                 |
| Tufail M, Amin M, Akhtar W, Khan H, Qureshi A, Manzoor S. Radon concentration in some houses of Islamabad and Rawalpindi, Pakistan. <i>Int J Rad Appl Instrum D.</i> 1991; 19(1): 429-30                                                                                                                                                                                                                           |
| Alam MA, Maqbool A, Nazir MM, Lateef M, Khan MS, Ahmed AN, Ziaullah M, Lindsay DS. Prevalence of <i>Entamoeba histolytica</i> -like cysts compared to <i>E. histolytica</i> antigens detected by ELISA in the stools of 600 patients from three socioeconomic communities in the Metropolitan City of Lahore, Pakistan. <i>J Parasitol.</i> 2015; 101(2): 236-9                                                    |
| Indian Council of Medical Research (ICMR). India National Sample Survey on Leprosy Burden 2010-2011                                                                                                                                                                                                                                                                                                                |
| Shera AS, Rafique G, Khwaja IA, Baqai S, Khan IA, King H. Pakistan national diabetes survey prevalence of glucose intolerance and associated factors in North West at Frontier Province (NWFP) of Pakistan. <i>J Pak Med Assoc.</i> 1999; 49(9): 206-11                                                                                                                                                            |
| Matiullah null, Ahad A, Rehman S, Mirza ML. Indoor radon levels and lung cancer risk estimates in seven cities of the Bahawalpur Division, Pakistan. <i>Radiat Prot Dosimetry.</i> 2003; 107(4): 269-76                                                                                                                                                                                                            |
| Khawar R, Malik F. Bullying Behavior of Pakistani Pre-adolescents: Findings Based on Olweus Questionnaire. <i>Pak J Psychol Res.</i> 2016; 31(1): 23-43                                                                                                                                                                                                                                                            |
| Bureau of Statistics Punjab (Pakistan), Federal Bureau of Statistics (Pakistan), Government of Pakistan, Government of Punjab (Pakistan), UNICEF Pakistan, United Nations Children's Fund (UNICEF), University of the Punjab (Pakistan). Pakistan - Punjab Multiple Indicator Cluster Survey 2007-2008                                                                                                             |
| Malik A, Yasar A, Tabinda AB, Zaheer IE, Malik K, Batool A, Mahfooz Y. Assessing spatio-temporal trend of vector breeding and dengue fever incidence in association with meteorological conditions. <i>Environ Monit Assess.</i> 2017; 189(4): 189                                                                                                                                                                 |
| Ahmad S, Asif M, Talib R, Adeel M, Yasir M, Chaudary MH. Surveillance of intensity level and geographical spreading of dengue outbreak among males and females in Punjab, Pakistan: A case study of 2011. <i>J Infect Public Health.</i> 2018; 11(4): 472-485                                                                                                                                                      |
| Alam MM, Khurshid A, Shaukat S, Suleman RM, Sharif S, Angez M, Malik SA, Ahmed TM, Aamir UB, Naeem M, Zaidi SS. Epidemiology and genetic diversity of rotavirus strains in children with acute gastroenteritis in Lahore, Pakistan. <i>PLoS One.</i> 2013; 8(6): e67998                                                                                                                                            |
| Wahid B. An update on the severe outbreak of HIV in Kot Imrana, Pakistan. <i>Lancet Infect Dis.</i> 2019; 19(3): 241                                                                                                                                                                                                                                                                                               |
| Williams H, Stewart A, Von Mutius E, Cookson W, Anderson HR. Is eczema really on the increase worldwide. <i>J Allergy Clin Immunol.</i> 2008; 121(4): 947-954                                                                                                                                                                                                                                                      |
| Moisi JC, Saha SK, Falade AG, Njanpop-Lafourcade B-M, Oundo J, Zaidi AKM, Afroj S, Bakare RA, Buss JK, Lasi R, Mueller J, Odekanmi AA, Sangare L, Scott JAG, Knoll MD, Levine OS, Gessner BD. Enhanced diagnosis of pneumococcal meningitis with use of the binax NOW immunochromatographic test of <i>Streptococcus pneumoniae</i> antigen: A multisite study. <i>Clin Infect Dis.</i> 2009; 48(Suppl 2): S49-S56 |



|                                                                                                                                                                                                                                                                                                                                                          |
|----------------------------------------------------------------------------------------------------------------------------------------------------------------------------------------------------------------------------------------------------------------------------------------------------------------------------------------------------------|
| Zaidi AKM, Khan H, Lasi R, Mahesar W. Surveillance of pneumococcal meningitis among children in Sindh, Southern Pakistan. <i>Clin Infect Dis</i> . 2009; 48 Suppl 2(Suppl 2): S129-S135                                                                                                                                                                  |
| Von Seidlein L, Kim DR, Ali M, Lee H, Wang X, Thiem VD, Canh DG, Chaicumpa W, Agtini MD, Hossain A, Bhutta ZA, Mason C, Sethabutr O, Talukder K, Nair GB, Deen JL, Kotloff K, Clemens J. A Multicentre Study of Shigella Diarrhoea in Six Asian Countries: Disease Burden, Clinical Manifestations, and Microbiology. <i>PLoS Med</i> . 2006; 3(9): e353 |
| Worldwide variations in the prevalence of asthma symptoms: the International Study of Asthma and Allergies in Childhood (ISAAC). <i>Eur Respir J</i> . 1998; 12(2): 315-35                                                                                                                                                                               |
| Basit A, Hydrie MZ, Hakeem R, Ahmedani MY, Masood Q. Frequency of chronic complications of type II diabetes. <i>J Coll Physicians Surg Pak</i> . 2004; 14(2): 79-83                                                                                                                                                                                      |
| Khan MI, Soofi SB, Ochiai RL, Khan MJ, Sahito SM, Habib MA, Puri MK, Von Seidlein L, Park JK, You YA, Ali M, Nizami SQ, Acosta CJ, Sack RB, Clemens JD, Bhutta ZA. Epidemiology, clinical presentation, and patterns of drug resistance of Salmonella Typhi in Karachi, Pakistan. <i>J Infect Dev Ctries</i> . 2012; 6(10): 704-14                       |
| Owais A, Sultana S, Zaman U, Rizvi A, Zaidi AKM. Incidence of typhoid bacteremia in infants and young children in southern coastal Pakistan. <i>Pediatr Infect Dis J</i> . 2010; 29(11): 1035-9                                                                                                                                                          |
| Hasnain SM, Khan M, Saleem A, Waqar MA. Prevalence of asthma and allergic rhinitis among school children of Karachi, Pakistan, 2007. <i>J Asthma</i> . 2009; 46(1): 86-90                                                                                                                                                                                |
| Dawani N, Nisar N, Khan N, Syed S, Tanweer N. Prevalence and factors related to dental caries among pre-school children of Saddar town, Karachi, Pakistan: a cross-sectional study. <i>BMC Oral Health</i> . 2012; 59                                                                                                                                    |
| Zaidi AKM, Khan H, Sherali AR, Lasi R, Sindh Meningitis Study Group. Burden of Haemophilus influenzae type b disease in Pakistani children. <i>East Mediterr Health J</i> . 2010; 16(6): 590-4                                                                                                                                                           |
| Nishio O, Matsui K, Oka T, Ushijima H, Mubina A, Dure-Samin A, Isomura S. Rotavirus infection among infants with diarrhea in Pakistan. <i>Pediatr Int</i> . 2000; 42(4): 425-7                                                                                                                                                                           |
| Shershah S, Morrison JJ, Jafarey S. Prevalence of premenstrual syndrome in Pakistani women. <i>J Pak Med Assoc</i> . 1991; 41(5): 101-3                                                                                                                                                                                                                  |
| Nisar N, Zehra N, Haider G, Munir AA, Sohoo NA. Frequency, intensity and impact of premenstrual syndrome in medical students. <i>J Coll Physicians Surg Pak</i> . 2008; 18(8): 481-4                                                                                                                                                                     |
| Shaikh SP, Aziz TM. Pattern of eye diseases in children of 5-15 years at Bazzertaline Area (South Karachi) Pakistan. <i>J Coll Physicians Surg Pak</i> . 2005; 15(5): 291-4                                                                                                                                                                              |
| Shera AS, Rafique G, Khawaja IA, Ara J, Baqai S, King H. Pakistan national diabetes survey: prevalence of glucose intolerance and associated factors in Shikarpur, Sindh Province. <i>Diabet Med</i> . 1995; 12(12): 1116-21                                                                                                                             |
| Aziz H, Güvener A, Akhtar SW, Hasan KZ. Comparative epidemiology of epilepsy in Pakistan and Turkey: population-based studies using identical protocols. <i>Epilepsia</i> . 1997; 38(6): 716-22                                                                                                                                                          |
| Durkin MS, Davidson LL, Hasan ZM, Hasan Z, Hauser WA, Khan N, Paul TJ, Shrout PE, Thorburn MJ, Zaman S. Estimates of the prevalence of childhood seizure disorders in communities where professional resources are scarce: results from Bangladesh, Jamaica and Pakistan. <i>Paediatr Perinat Epidemiol</i> . 1992; 6(2): 166-80                         |
| Nisar N, Billoo N, Gadit AA. Prevalence of depression and the associated risks factors among adult women in a fishing community. <i>J Pak Med Assoc</i> . 2004; 54(10): 519-25                                                                                                                                                                           |

|                                                                                                                                                                                                                                                                                                                                                                                                    |
|----------------------------------------------------------------------------------------------------------------------------------------------------------------------------------------------------------------------------------------------------------------------------------------------------------------------------------------------------------------------------------------------------|
| Almani SA, Memon AS, Memon AI, Shah MI, Rahpoto MQ, Solangi R. Cirrhosis of liver: Etiological factors, complications and prognosis. JLUMHS. 2008; 7(2): 61-6                                                                                                                                                                                                                                      |
| Curado MP, Edwards B, Shin HR, Storm H, Ferlay J, Heanue M and Boyle P, eds (2007). Cancer Incidence in Five Continents, Vol. IX Periodic Data (electronic version). Lyon, IARC. <a href="http://ci5.iarc.fr">http://ci5.iarc.fr</a>                                                                                                                                                               |
| Parkin DM, International Agency for Research on Cancer, International Association of Cancer Registries. Cancer Incidence in Five Continents. Vol. I to VIII. Lyon, France, IARC Press, 2005                                                                                                                                                                                                        |
| Hasan R, Zafar A, Abbas Z, Mahraj V, Malik F, Zaidi A. Antibiotic resistance among Salmonella enterica serovars Typhi and Paratyphi A in Pakistan (2001-2006). J Infect Dev Ctries. 2008; 2(04): 289-94                                                                                                                                                                                            |
| Khan MI, Sahito SM, Khan MJ, Wassan SM, Shaikh AW, Maheshwari AK, Acosta CJ, Galindo CM, Ochiai RL, Rasool S, Peerwani S, Puri MK, Ali M, Zafar A, Hassan R, von Seidlein L, Clemens JD, Nizami SQ, Bhutta ZA. Enhanced disease surveillance through private health care sector cooperation in Karachi, Pakistan: experience from a vaccine trial. Bull World Health Organ. 2006; 84(1): 72-7      |
| Ochiai RL, Wang X, von Seidlein L, Yang J, Bhutta ZA, Bhattacharya SK, Agtini M, Deen JL, Wain J, Kim DR, Ali M, Acosta CJ, Jodar L, Clemens JD. Salmonella Paratyphi A Rates, Asia. Emerg Infect Dis. 2005; 11(11): 1764-6                                                                                                                                                                        |
| Siddiqui FJ, Rabbani F, Hasan R, Nizami SQ, Bhutta ZA. Typhoid fever in children: some epidemiological considerations from Karachi, Pakistan. Int J Infect Dis. 2006; 10(3): 215-22                                                                                                                                                                                                                |
| Ochiai RL, Acosta CJ, Danovaro-Holliday MC, Baiqing D, Bhattacharya SK, Agtini MD, Bhutta ZA, Canh DG, Ali M, Shin S, Wain J, Page A-L, Albert MJ, Farrar J, Abu-Elyazeed R, Pang T, Galindo CM, von Seidlein L, Clemens JD, Domi Typhoid Study Group. A study of typhoid fever in five Asian countries: disease burden and implications for controls. Bull World Health Organ. 2008; 86(4): 260-8 |
| Khan MI, Ochiai RL, Soofi SB, Von-Seidlein L, Khan MJ, Sahito SM, Habib MA, Puri MK, Park JK, You YA, Ali M, Nizami SQ, Acosta CJ, Bradley-Sack R, Clemens JD, Bhutta ZA. Risk factors associated with typhoid fever in children aged 2-16 years in Karachi, Pakistan. Epidemiol Infect. 2012; 140(4): 665-72                                                                                      |
| Musani MA, Rauf A, Ahsan M, Khan FA. Frequency and causes of hearing impairment in tertiary care center. J Pak Med Assoc. 2011; 61(2): 141-4                                                                                                                                                                                                                                                       |
| Hameed K, Gibson T, Kadir M, Sultana S, Fatima Z, Syed A. The prevalence of rheumatoid arthritis in affluent and poor urban communities of Pakistan. Rheumatology (Oxford). 1995; 34(3): 252-6                                                                                                                                                                                                     |
| Hakim S, Kazmi S, Bagasra O. Seroprevalence of Hepatitis B and C Genotypes Among Young Apparently Healthy Females of Karachi-Pakistan. Libyan J Med. 2008; 3(2): 66-70                                                                                                                                                                                                                             |
| Molla A, Khurshid M, Molla AM. Prevalence of iron deficiency anaemia in children of the urban slums of Karachi. J Pak Med Assoc. 1992; 42(5): 118-21                                                                                                                                                                                                                                               |
| Agha F, Hasan TJ, Khan RA, Jafarey S. Iron stores in maternal and cord blood. Asia Oceania J Obstet Gynaecol. 1988; 14(4): 405-9                                                                                                                                                                                                                                                                   |
| Baig L, Thaver IH, Iqbal R. Risk factors associated with anaemia in children less than 5 years of age residing in a squatter settlement of Karachi. Pak J Med Res. 1996; 35(4): 176-178                                                                                                                                                                                                            |

|                                                                                                                                                                                                                                                                                                                                                                                                                                                                                                                                                                                                                                                                                                                             |
|-----------------------------------------------------------------------------------------------------------------------------------------------------------------------------------------------------------------------------------------------------------------------------------------------------------------------------------------------------------------------------------------------------------------------------------------------------------------------------------------------------------------------------------------------------------------------------------------------------------------------------------------------------------------------------------------------------------------------------|
| Abdul Mujeeb S, Aamir K, Mehmood K. Seroprevalence of HBV, HCV and HIV infections among college going first time voluntary blood donors. <i>J Pak Med Assoc.</i> 2000; 50(8): 269-70                                                                                                                                                                                                                                                                                                                                                                                                                                                                                                                                        |
| Abdul Mujeeb S, Nanan D, Sabir S, Altaf A, Kadir M. Hepatitis B and C infection in first-time blood donors in Karachi--a possible subgroup for sentinel surveillance. <i>East Mediterr Health J.</i> 2006; 12(6): 735-41                                                                                                                                                                                                                                                                                                                                                                                                                                                                                                    |
| Akhtar S, Younus M, Adil S, Jafri SH, Hassan F. Hepatitis C virus infection in asymptomatic male volunteer blood donors in Karachi, Pakistan. <i>J Viral Hepat.</i> 2004; 11(6): 527-35                                                                                                                                                                                                                                                                                                                                                                                                                                                                                                                                     |
| Bilwani F, Zaidi Y, Kakepoto GN, Adil SN, Khurshid M. Prevalence of hepatitis C virus in lymphoproliferative disorders. <i>J Pak Med Assoc.</i> 2004; 54(4): 202-6                                                                                                                                                                                                                                                                                                                                                                                                                                                                                                                                                          |
| Masood Z. Screening for Hepatitis B & C: A routine pre-operative investigation. <i>Pak J Med Sci.</i> 2005; 21(4): 455-9                                                                                                                                                                                                                                                                                                                                                                                                                                                                                                                                                                                                    |
| Aziz S, Muzaffar R, Hafiz S, Abbas Z, Zafar MN, Naqvi SA, Rizvi SA. Helicobacter Pylori, Hepatitis Viruses A, C, E, Antibodies And HBsAg - Prevalence And Associated Risk Factors In Pediatric Communities Of Karachi. <i>J Coll Physicians Surg Pak.</i> 2007; 17(4): 195-8                                                                                                                                                                                                                                                                                                                                                                                                                                                |
| Siddiqui AR, Lee K, Bennett D, Yang X, Brown KH, Bhutta ZA, Gold EB. Indoor carbon monoxide and PM2.5 concentrations by cooking fuels in Pakistan. <i>Indoor Air.</i> 2009; 19(1): 75-82                                                                                                                                                                                                                                                                                                                                                                                                                                                                                                                                    |
| Moiz B, Moatter T, Shaikh U, Adil S, Ali N, Mahar F, Shamsuddin N, Khurshid M. Estimating window period blood donations for human immunodeficiency virus Type 1, hepatitis C virus, and hepatitis B virus by nucleic acid amplification testing in Southern Pakistan. <i>Transfusion.</i> 2014; 54.0(6): 1652-9                                                                                                                                                                                                                                                                                                                                                                                                             |
| Khan E, Memon BI, Ayaz A, Malik F, Shamim SF, Polani FS, Zafar A. Trend of syphilis in Pakistan, 1991-2008. <i>Indian J Med Microbiol.</i> 2010; 28(3): 263-4                                                                                                                                                                                                                                                                                                                                                                                                                                                                                                                                                               |
| Kotloff KL, Nataro JP, Blackwelder WC, Nasrin D, Farag TH, Panchalingam S, Wu Y, Sow SO, Sur D, Breiman RF, Faruque AS, Zaidi AK, Saha D, Alonso PL, Tamboura B, Sanogo D, Onwuchekwa U, Manna B, Ramamurthy T, Kanungo S, Ochieng JB, Omere R, Oundo JO, Hossain A, Das SK, Ahmed S, Qureshi S, Quadri F, Adegbola RA, Antonio M, Hossain MJ, Akinsola A, Mandomando I, Nhampossa T, Acácio S, Biswas K, O'Reilly CE, Mintz ED, Berkeley LY, Muhsen K, Sommerfelt H, Robins-Browne RM, Levine MM. Burden and aetiology of diarrhoeal disease in infants and young children in developing countries (the Global Enteric Multicenter Study, GEMS): a prospective, case-control study. <i>Lancet.</i> 2013; 382(9888): 209-22 |
| Nizami SQ, Bhutta ZA, Hasan R. Incidence of acute respiratory infections in children 2 months to 5 years of age in periurban communities in Karachi, Pakistan. <i>J Pak Med Assoc.</i> 2006; 56(4): 163-7                                                                                                                                                                                                                                                                                                                                                                                                                                                                                                                   |
| Ali A, Khowaja AR, Bashir MZ, Aziz F, Mustafa S, Zaidi A. Role of human metapneumovirus, influenza A virus and respiratory syncytial virus in causing WHO-defined severe pneumonia in children in a developing country. <i>PLoS One.</i> 2013; 8(9): e74756                                                                                                                                                                                                                                                                                                                                                                                                                                                                 |
| Khowaja AR, Mohiuddin S, Cohen AL, Khalid A, Mehmood U, Naqvi F, Asad N, Pardhan K, Mulholland K, Hajjeh R, Zaidi AK, Shafqat S. Mortality and neurodevelopmental outcomes of acute bacterial meningitis in children aged                                                                                                                                                                                                                                                                                                                                                                                                                                                                                                   |
| Aga Khan University, Center for Vaccine Development (Chile), Center for Vaccine Development, University of Maryland, Centers for Disease Control and Prevention (CDC),                                                                                                                                                                                                                                                                                                                                                                                                                                                                                                                                                      |

|                                                                                                                                                                                                                                                                                                                                                                                                                                                   |
|---------------------------------------------------------------------------------------------------------------------------------------------------------------------------------------------------------------------------------------------------------------------------------------------------------------------------------------------------------------------------------------------------------------------------------------------------|
| <p>Department of Medical Microbiology and Immunology, Göteborg University, International Vaccine Institute, Perry Point Cooperative Studies Program Coordinating Center, U.S. Department of Veterans Affairs, School of Medicine, University of Virginia, University of Chile. Pakistan - Karachi Global Enteric Multicenter Study 2011-2013. Baltimore, MD, United States of America: Center for Vaccine Development, University of Maryland</p> |
| <p>Shera AS, Jawad F, Maqsood A, Jamal S, Azfar M, Ahmed U. Prevalence of chronic complications and associated factors in type 2 diabetes. <i>J Pak Med Assoc.</i> 2004; 54(2): 54–9</p>                                                                                                                                                                                                                                                          |
| <p>Imran S, Sheikh A, Saeed Z, Khan SA, Malik AO, Patel J, Kashif W, Hussain A. Burden of chronic kidney disease in an urban city of Pakistan, a cross-sectional study. <i>J Pak Med Assoc.</i> 2015; 65(4): 366-9</p>                                                                                                                                                                                                                            |
| <p>Khan AA, Tanzil S, Jamali T, Shahid A, Naeem S, Sahito A, Siddiqui FA, Nafees AA, Fatmi Z. Burden of asthma among children in a developing megacity: childhood asthma study, Pakistan. <i>J Asthma.</i> 2014; 51(9): 891-9</p>                                                                                                                                                                                                                 |
| <p>Jafar TH, Islam M, Hatcher J, Poulter N, Chaturvedi N, Chronic Kidney Disease Prognosis Consortium (CKD-PC). Pakistan - Karachi Control of Blood Pressure and Risk Attenuation (COBRA) Chronic Kidney Disease Prevalence Data 2004 [Unpublished]</p>                                                                                                                                                                                           |
| <p>Deepa M, Grace M, Binukumar B, Pradeepa R, Roopa S, Khan HM, Fatmi Z, Kadir MM, Naeem I, Ajay VS, Anjana RM, Ali MK, Prabhakaran D, Tandon N, Mohan V, Narayan KM; CARRS Surveillance Research Group. High burden of prediabetes and diabetes in three large cities in South Asia: The Center for Cardio-metabolic Risk Reduction in South Asia (CARRS) Study. <i>Diabetes Res Clin Pract.</i> 2015; 110(2): 172-82</p>                        |
| <p>Abbas Z, Siddiqui A-R, Luck NH, Hassan M, Mirza R, Naqvi A, Rizvi AH. Prognostic factors of survival in patients with non-resectable hepatocellular carcinoma: hepatitis C versus miscellaneous etiology. <i>J Pak Med Assoc.</i> 2008; 58(11): 602-7</p>                                                                                                                                                                                      |
| <p>Abbasi A, Bhutto AR, Butt N, Munir SM. Correlation of serum alpha fetoprotein and tumor size in hepatocellular carcinoma. <i>J Pak Med Assoc.</i> 2012; 62(1): 33-6</p>                                                                                                                                                                                                                                                                        |
| <p>Abbasi A, Butt N, Bhutto AR, Gulzar K, Munir SM. Hepatocellular carcinoma: a clinicopathological study. <i>J Coll Physicians Surg Pak.</i> 2010; 20(8): 510-3</p>                                                                                                                                                                                                                                                                              |
| <p>Ali A, Yousafzai MT, Waris R, Jafri F, Aziz F, Abbasi IN, Zaidi A. RSV associated hospitalizations in children in Karachi, Pakistan: Implications for vaccine prevention strategies. <i>J Med Virol.</i> 2017; 89(7): 1151–7</p>                                                                                                                                                                                                               |
| <p>Murtaza G, Memon IA, Memon AR, Lal MN, Kallar NA. Malaria morbidity in Sindh and the Plasmodium species distribution. <i>Pak J Med Sci.</i> 2009; 25(4): 646-649 as it appears in Malaria Atlas Project. Malaria Atlas Project Annual Parasite Incidence Database</p>                                                                                                                                                                          |
| <p>Khan MI, Ochiai RL, Von Seidlein L, Dong B, Bhattacharya SK, Agtini MD, Bhutta ZA, Do GC, Ali M, Kim DR, Favorov M, Clemens JD. Non-typhoidal Salmonella rates in febrile children at sites in five Asian countries: Non-typhoidal Salmonella in Asia. <i>Trop Med Int Health.</i> 2010; 15(8): 960–3</p>                                                                                                                                      |
| <p>Jessani S, Bux R, Jafar TH. Prevalence, determinants, and management of chronic kidney disease in Karachi, Pakistan - a community based cross-sectional study. <i>BMC Nephrol.</i> 2014; 15: 90</p>                                                                                                                                                                                                                                            |

|                                                                                                                                                                                                                                                                                                                                                                                                                                                                                                                             |
|-----------------------------------------------------------------------------------------------------------------------------------------------------------------------------------------------------------------------------------------------------------------------------------------------------------------------------------------------------------------------------------------------------------------------------------------------------------------------------------------------------------------------------|
| Alam A, Amanullah F, Baig-Ansari N, Lotia-Farrukh I, Khan FS. Prevalence and risk factors of kidney disease in urban Karachi: baseline findings from a community cohort study. BMC Res Notes. 2014; 7: 179                                                                                                                                                                                                                                                                                                                  |
| Khan S, Khalid T, Awan KH. Chronic periodontitis and smoking. Prevalence and dose-response relationship. Saudi Med J. 2016; 37(8): 889-94                                                                                                                                                                                                                                                                                                                                                                                   |
| International Agency for Research on Cancer (IARC), International Association of Cancer Registries (IACR), World Health Organization (WHO). International Incidence of Childhood Cancer Volume III. Lyon, France: International Agency for Research on Cancer (IARC), 2017                                                                                                                                                                                                                                                  |
| Pakistan - Karachi Cancer Registry 1995-2002 - IICC-3 as it appears in International Agency for Research on Cancer (IARC), International Association of Cancer Registries (IACR), World Health Organization (WHO). International Incidence of Childhood Cancer Volume III. Lyon, France: International Agency for Research on Cancer (IARC), 2017                                                                                                                                                                           |
| Applied Economics Research Centre (AERC) (Pakistan), Bureau of Statistics, Planning and Development Department, Government of Sindh (Pakistan), Eycon Solutions (Pakistan), Federal Bureau of Statistics (Pakistan), Government of Sindh (Pakistan), Marketing and Advertising Research Services (MARS) (Pakistan), Sindh Bureau of Statistics (Pakistan), Strengthening Participatory Organization (SPO) (Pakistan), United Nations Children's Fund (UNICEF). Pakistan - Sindh Multiple Indicator Cluster Survey 2003-2004 |
| Abdullah FE, Memon AA, Mushtaq A, Adil SE-R, Kazmi SU. Frequency of HBsAg positivity: a laboratory data analysis. J Coll Physicians Surg Pak. 2012; 22(11): 7423                                                                                                                                                                                                                                                                                                                                                            |
| Abdulla EM, Abdulla FE. Seropositive HBsAg frequency in Karachi and interior Sindh, Pakistan. Pak J Med Sci. 2007; 23(2): 157-60                                                                                                                                                                                                                                                                                                                                                                                            |
| Mir F, Mahmood F, Siddiqui AR, Baqi S, Abidi SH, Kazi AM, Nathwani AA, Ladhani A, Qamar FN, Soofi SB, Memon SA, Soomro J, Shaikh SA, Simms V, Khan P, Ferrand RA. HIV infection predominantly affecting children in Sindh, Pakistan, 2019: a cross-sectional study of an outbreak. Lancet Infect Dis. 2019                                                                                                                                                                                                                  |

#### 4.2. Source counts by national and subnational administrative units

##### Pakistan source counts by location

| Location                    | Source counts |
|-----------------------------|---------------|
| Pakistan                    | 1571          |
| Azad Jammu & Kashmir        | 272           |
| Balochistan                 | 296           |
| Gilgit-Baltistan            | 255           |
| Islamabad Capital Territory | 268           |
| Khyber Pakhtunkhwa          | 319           |
| Punjab                      | 323           |
| Sindh                       | 384           |

## Section 5: Politics and governance

### 5.1. Political chronology, 1990–2019

| Year | Event(s)                                                                                                                                                                                                                 |
|------|--------------------------------------------------------------------------------------------------------------------------------------------------------------------------------------------------------------------------|
| 1990 | Benazir Bhutto dismissed as prime minister                                                                                                                                                                               |
| 1991 | Prime Minister Nawaz Sharif begins economic liberalisation programmes                                                                                                                                                    |
| 1993 | Prime Minister Sharif resigns under pressure from military. Benazir Bhutto reelected.                                                                                                                                    |
| 1996 | President Leghari dismisses Bhutto government amid corruption allegations.                                                                                                                                               |
| 1997 | Nawaz Sharif returns as prime minister after Muslim League wins elections.                                                                                                                                               |
| 1998 | Pakistan conducts nuclear tests after India explodes several nuclear devices.                                                                                                                                            |
| 1999 | Benazir Bhutto and husband convicted of corruption and given jail sentences. Bhutto voluntarily exiled.                                                                                                                  |
| 1999 | General Pervez Musharraf seizes power in coup.                                                                                                                                                                           |
| 2000 | Nawaz Sharif sentenced to life imprisonment on hijacking and terrorism charges over his actions to prevent the 1999 coup.                                                                                                |
| 2001 | General Pervez Musharraf names himself president while remaining head of the military.                                                                                                                                   |
| 2002 | Musharraf wins another five years in office in a controversial referendum.                                                                                                                                               |
| 2005 | Pakistan tests its first nuclear-capable cruise missile.                                                                                                                                                                 |
| 2005 | Earthquake kills tens of thousands of people in Pakistani-administered Kashmir.                                                                                                                                          |
| 2007 | Pakistan and India sign an agreement aimed at reducing the risk of accidental nuclear war.                                                                                                                               |
| 2007 | Ex-prime minister Benazir Bhutto returns from exile.                                                                                                                                                                     |
| 2007 | Musharraf's reelection challenged by Supreme Court. He declares emergency rule, dismisses Chief Justice Chaudhry, and appoints new Supreme Court, which confirms his re-election.                                        |
| 2007 | Benazir Bhutto assassinated at election campaign rally in Rawalpindi.                                                                                                                                                    |
| 2008 | Pakistan People's Party (PPP) nominee Yusuf Raza Gilani becomes Prime Minister at head of coalition with Nawaz Sharif's Muslim League party following parliamentary elections.                                           |
| 2008 | President Musharraf resigns.                                                                                                                                                                                             |
| 2012 | Supreme Court disqualifies Prime Minister Gilani from holding office. Parliament approves Water and Power Minister Raja Pervez Ashraf as his successor.                                                                  |
| 2013 | Parliament approves Nawaz Sharif as prime minister after his Muslim League-N wins parliamentary elections in May.                                                                                                        |
| 2017 | Prime Minister Nawaz Sharif is forced to resign after being disqualified by the Supreme Court over corruption charges. He is convicted and given a jail sentence. Parliament approves Shahid K. Abbasi as his successor. |
| 2018 | Former international cricket star Imran Khan becomes Prime Minister.                                                                                                                                                     |

## 5.2. Additional notes on the 18th amendment

The National Assembly of Pakistan ratified the 18<sup>th</sup> amendment of the constitution on April 8, 2010. The 18th amendment brought massive changes to the Pakistan political system. It confined the federal government's role in the health-care industry to health information, interprovincial coordination, global health, and health regulation, while all other health responsibilities were brought under provincial governments.

## Section 6: Appendix tables

Appendix Table 1: Life expectancy, HALE, and SDI for both sexes for Pakistan and comparator countries

We also analysed national estimates for six comparator countries: Iran, Indonesia, Afghanistan, China, Bangladesh, and India. Comparator countries were chosen based on similar socio-demographic levels and/or location adjacency. Supplemental Appendix Table 1 shows life expectancy and HALE for males, females, and both sexes combined for Pakistan, China, India, Iran, Afghanistan, Bangladesh, and Indonesia in 1990 and 2019. Life expectancy in Pakistan increased from 61.7 years (95% UI 60.9–62.6) in 1990 to 66.4 (63.8–69.1) in 2019 for males and from 61.6 (60.8–62.4) to 67.5 (65.1–70.1) for females, an increase of 7.6% (3.0–12.0) and 9.6% (5.3–14.0), respectively. HALE increased from 54.1 (51.8–56.2) in 1990 to 58.2 (55.3–61.1) in 2017 for males and from 52.5 (45.0–54.9) to 57.8 (54.6–60.9) for females, an increase of 7.6% (3.5–11.8) and 10.1% (6.3–13.8), respectively. Among all seven countries, only Afghanistan had a lower life expectancy and HALE than Pakistan in 2019. Both India and Bangladesh had lower life expectancies and HALE in 1990 than Pakistan but higher ones in 2019.

Supplementary Table 1. Comparison of life expectancy (LE), healthy life expectancy (HALE), and Socio-demographic Index (SDI) between Pakistan and select countries, 1990–2019

|                            | Life expectancy at birth, HALE, and Socio-demographic index, both sexes |                     |                     |                 |           |           |                     |                     |                     |               |                 |           |                         |        |       |              |                 |           |        |        |
|----------------------------|-------------------------------------------------------------------------|---------------------|---------------------|-----------------|-----------|-----------|---------------------|---------------------|---------------------|---------------|-----------------|-----------|-------------------------|--------|-------|--------------|-----------------|-----------|--------|--------|
|                            | Life expectancy at birth                                                |                     |                     | LE % Change     |           |           | HALE                |                     |                     | HALE % Change |                 |           | Socio-Demographic index |        |       | SDI % Change |                 |           |        |        |
|                            | 1990                                                                    | 2010                | 2019                | 1990–2010       | 2010–2019 | 1990–2019 | 1990                | 2010                | 2019                | 1990–2010     | 2010–2019       | 1990–2019 | 1990                    | 2010   | 2019  | 1990–2010    | 2010–2019       | 1990–2019 |        |        |
| Pakistan                   | 61.1<br>(60.0–62.1)                                                     | 63.3<br>(61.7–65.0) | 65.9<br>(63.8–67.8) | 3.60%           | 4.11%     | 7.86%     | 53.2<br>(50.8–55.3) | 55.1<br>(52.7–57.6) | 57.2<br>(54.3–60.1) | 3.57%         | 3.81%           | 7.52%     | 0.26                    | 0.417  | 0.476 | 60.38%       | 14.15%          | 83.08%    |        |        |
| South Asia                 | 59.5<br>(58.9–60.3)                                                     | 67.0<br>(66.3–67.7) | 70.4<br>(69.2–71.7) | 12.61%          | 5.07%     | 18.32%    | 51.2<br>(48.7–53.4) | 57.6<br>(54.9–59.9) | 60.4<br>(57.3–63.1) | 12.50%        | 4.80%           | 17.97%    | 0.312                   | 0.455  | 0.539 | 45.83%       | 18.46%          | 72.76%    |        |        |
| Bangladesh                 | 58.2<br>(57.1–59.2)                                                     | 70.0<br>(69.0–71.1) | 74.6<br>(72.4–76.7) | 20.27%          | 6.57%     | 28.18%    | 50.7<br>(48.3–52.8) | 61.0<br>(58.2–63.5) | 64.5<br>(61.3–67.4) | 20.32%        | 5.74%           | 27.22%    | 0.246                   | 0.389  | 0.475 | 58.13%       | 22.11%          | 93.09%    |        |        |
| India                      | 59.6<br>(58.7–60.5)                                                     | 67.3<br>(66.4–68.1) | 70.8<br>(69.3–72.2) | 12.92%          | 5.20%     | 18.79%    | 51.1<br>(48.5–53.3) | 57.6<br>(54.9–60.1) | 60.5<br>(57.4–63.3) | 12.72%        | 5.03%           | 18.40%    | 0.327                   | 0.469  | 0.558 | 43.43%       | 18.98%          | 70.64%    |        |        |
| Nepal                      | 58.3<br>(56.3–60.3)                                                     | 69.0<br>(67.5–70.5) | 71.1<br>(69.4–73.2) | 18.35%          | 3.04%     | 21.96%    | 50.4<br>(47.7–53.1) | 59.8<br>(56.9–62.3) | 61.5<br>(58.6–64.4) | 18.65%        | 2.84%           | 22.02%    | 0.198                   | 0.358  | 0.427 | 80.81%       | 19.27%          | 115.66%   |        |        |
| Mexico                     | 70.9<br>(70.5–71.2)                                                     | 75.2<br>(75.0–75.5) | 75.6<br>(74.6–76.7) | 6.06%           | 0.53%     | 6.63%     | 61.4<br>(58.7–63.8) | 65.4<br>(62.2–67.7) | 65.2<br>(62.3–68.1) | 6.19%         | 0.31%           | 6.51%     | 0.492                   | 0.593  | 0.636 | 20.53%       | 7.25%           | 29.27%    |        |        |
| Brazil                     | 67.3<br>(66.9–67.7)                                                     | 73.8<br>(73.5–74.2) | 75.8<br>(75.4–76.3) | 9.66%           | 2.71%     | 12.63%    | 58.0<br>(55.2–60.4) | 63.5<br>(60.5–66.1) | 65.2<br>(62.2–67.9) | 9.48%         | 2.68%           | 12.41%    | 0.484                   | 0.594  | 0.64  | 22.73%       | 7.74%           | 32.23%    |        |        |
| Afghanistan                | 53.8<br>(51.4–56.0)                                                     | 60.5<br>(57.5–63.2) | 63.3<br>(60.7–65.9) | 12.45%          | 4.63%     | 17.66%    | 45.6<br>(41.3–49.0) | 51.7<br>(48.0–54.8) | 54.1<br>(50.7–57.2) | 13.38%        | 4.64%           | 18.64%    | 0.179                   | 0.248  | 0.332 | 38.55%       | 33.87%          | 85.47%    |        |        |
| Iran (Islamic Republic of) | 66.7<br>(65.9–67.4)                                                     | 75.5<br>(75.2–75.7) | 77.8<br>(77.5–78.0) | 13.19%          | 3.05%     | 16.64%    | 57.8<br>(55.1–60.1) | 65.0<br>(62.0–67.6) | 66.8<br>(63.7–69.7) | 12.46%        | 2.77%           | 15.57%    | 0.43                    | 0.636  | 0.697 | 47.91%       | 9.59%           | 62.09%    |        |        |
| China                      | 68.1<br>(67.0–69.4)                                                     | 74.9<br>(74.2–75.7) | 77.6<br>(76.3–79.0) | 9.99%           | 3.60%     | 13.95%    | 60.5<br>(58.1–62.7) | 66.6<br>(64.1–68.8) | 68.5<br>(65.9–71.0) | 10.08%        | 2.85%           | 13.22%    | 0.44                    | 0.624  | 0.692 | 41.82%       | 10.90%          | 57.27%    |        |        |
| Indonesia                  | 64.1<br>(63.2–64.9)                                                     | 69.3<br>(68.2–70.3) | 71.4<br>(70.0–73.0) | 8.11%           | 3.03%     | 11.39%    | 55.9<br>(53.5–58.1) | 60.9<br>(58.4–63.2) | 62.6<br>(59.9–65.0) | 8.94%         | 2.79%           | 11.99%    | 0.458                   | 0.593  | 0.658 | 29.48%       | 10.96%          | 43.67%    |        |        |
| Maldives                   | 65.5<br>(64.8–66.2)                                                     | 77.8<br>(77.2–78.3) | 79.1<br>(77.6–80.6) | 18.78%          | 1.67%     | 20.76%    | 57.5<br>(55.1–59.7) | 68.1<br>(65.3–70.5) | 69.1<br>(66.1–71.8) | 18.43%        | 1.47%           | 20.17%    | 0.321                   | 0.519  | 0.579 | 61.68%       | 11.56%          | 80.37%    |        |        |
| Sri Lanka                  | 69.6<br>(68.9–70.3)                                                     | 74.1<br>(73.9–74.2) | 77.3<br>(74.8–80.1) | 6.47%           | 4.32%     | 11.06%    | 61.0<br>(58.4–63.3) | 64.5<br>(61.7–66.9) | 66.9<br>(63.3–70.3) | 5.74%         | 3.72%           | 9.67%     | 0.505                   | 0.624  | 0.685 | 23.56%       | 9.78%           | 35.64%    |        |        |
| Nigeria                    | 54.7<br>(52.9–56.6)                                                     | 59.6<br>(57.5–61.8) | 64.3<br>(62.2–66.6) | 8.96%           | 7.89%     | 17.55%    | 47.6<br>(45.3–50.1) | 52.0<br>(49.1–54.7) | 56.0<br>(53.0–58.9) | 9.24%         | 7.69%           | 17.65%    | 0.249                   | 0.378  | 0.461 | 51.81%       | 23.96%          | 85.14%    |        |        |
|                            |                                                                         |                     |                     | Average change: | 11.53%    | 3.96%     | 15.96%              |                     |                     |               | Average change: | 11.55%    | 3.66%                   | 15.64% |       |              | Average change: | 44.76%    | 15.47% | 67.60% |

Appendix Table 2: Healthcare Access and Quality Index for Pakistan, 1990-2019

| Healthcare Access and Quality (HAQ) Index for Pakistan and subnational units, 1990–2019 |                                           |                     |                    |
|-----------------------------------------------------------------------------------------|-------------------------------------------|---------------------|--------------------|
|                                                                                         | Healthcare Access and Quality (HAQ) Index |                     | HAQ Index % change |
|                                                                                         | 1990                                      | 2019                | 1990–2019          |
| Pakistan                                                                                | 21.9<br>(20.2–23.6)                       | 32.1<br>(30.4–33.8) | 46.94%             |
| Azad Jammu & Kashmir                                                                    | 24.3<br>(22.6–26.0)                       | 37.7<br>(36.1–39.3) | 54.79%             |
| Balochistan                                                                             | 24.6<br>(22.9–26.3)                       | 30.5<br>(29.0–32.2) | 24.13%             |
| Gilgit-Baltistan                                                                        | 22.2<br>(20.4–24.1)                       | 29.7<br>(28.2–31.3) | 33.89%             |
| Islamabad Capital Territory                                                             | 38.3<br>(36.6–40.3)                       | 56.1<br>(54.4–57.7) | 46.21%             |
| Khyber Pakhtunkhwa                                                                      | 29.0<br>(27.2–30.7)                       | 32.4<br>(30.8–33.9) | 11.63%             |
| Punjab                                                                                  | 20.4<br>(18.8–22.4)                       | 31.5<br>(30.0–33.1) | 54.17%             |
| Sindh                                                                                   | 24.4<br>(22.7–26.2)                       | 36.1<br>(34.5–37.7) | 47.59%             |

## Section 7: Appendix figures

Appendix Figure 1: Trends in communicable, maternal, neonatal, and nutritional causes for Khyber Pakhtunkhwa and Balochistan

(This image is accessible via GBD compare: <http://ihmeuw.org/5yh9>)

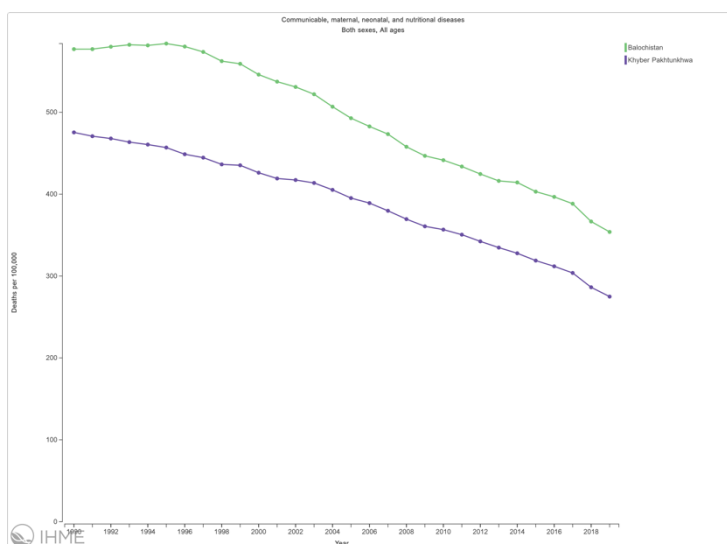



Appendix Figure 2: Political map of Pakistan

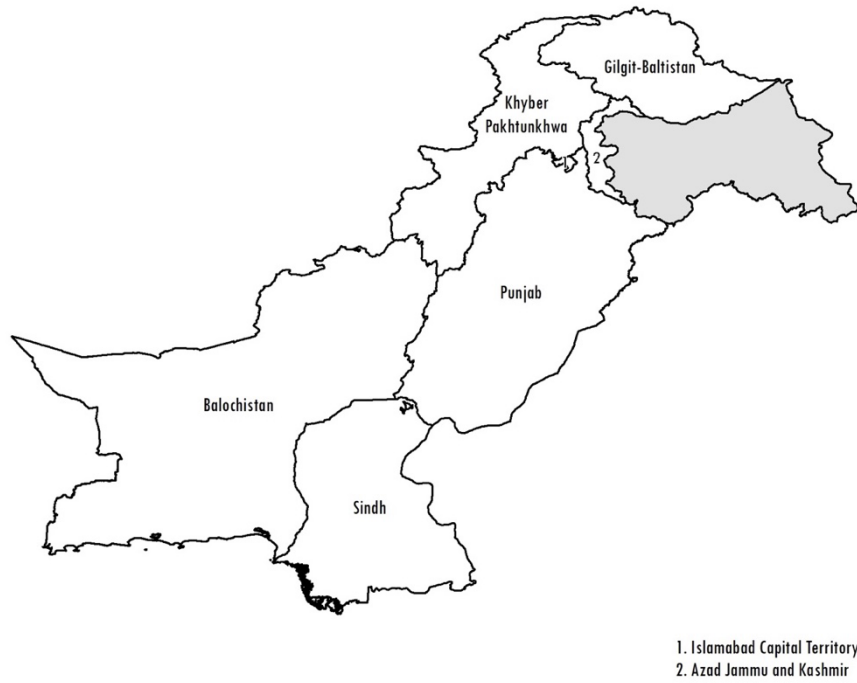

Appendix Figure 3: SDI values for Pakistan and seven subnational units, 1990–2019

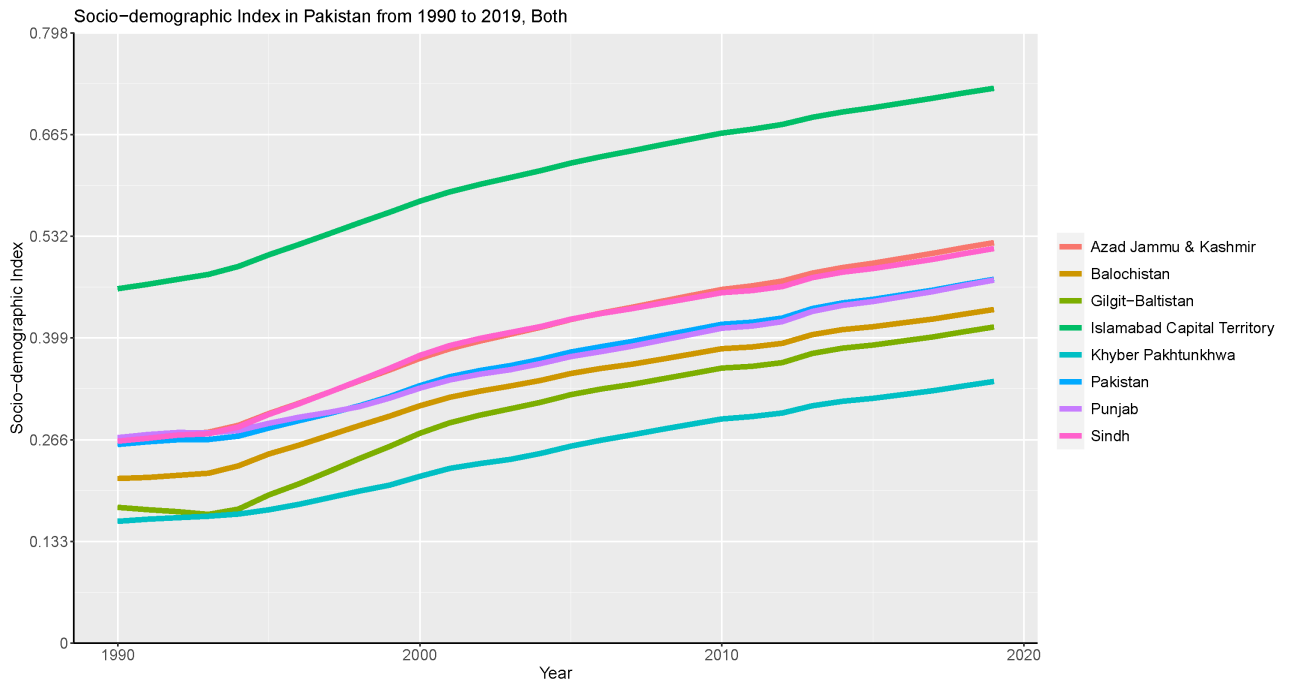

Appendix Figure 4: Leading causes of all-age deaths for both sexes, 1990 to 2019

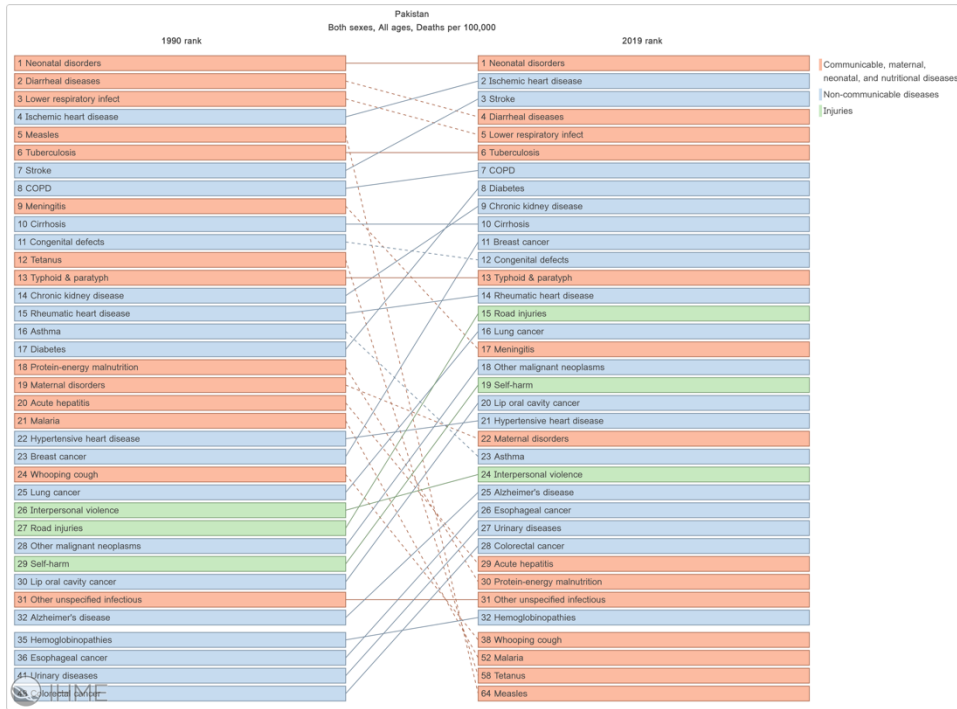

Appendix Figure 5: Leading causes of YLLs for all ages and both sexes, 1990 and 2019

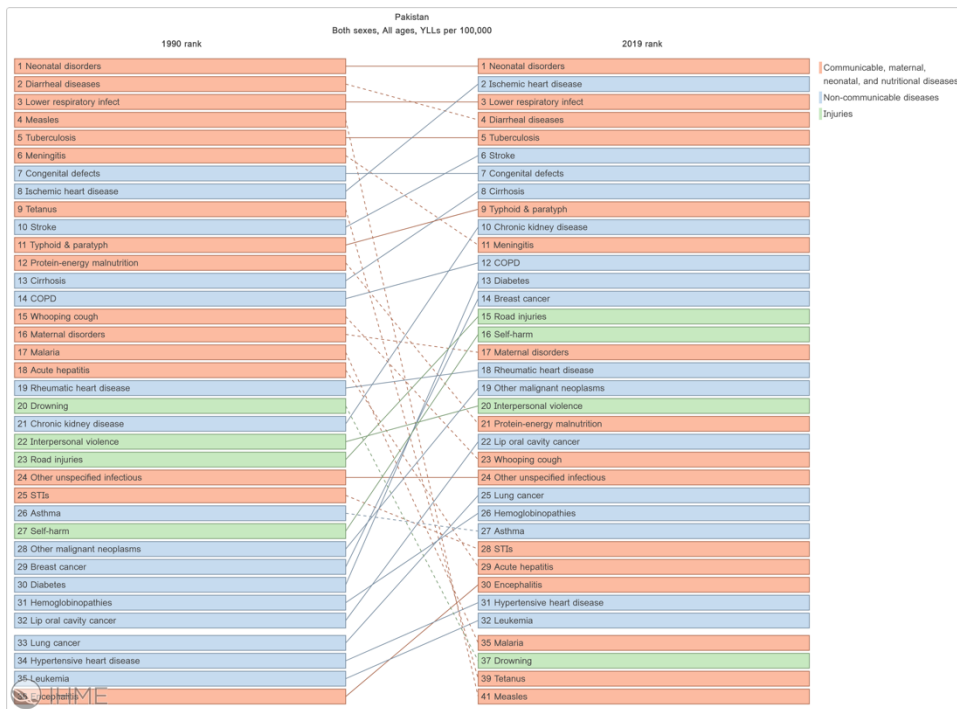

Appendix Figure 6: Changes in YLDs for all ages and both sexes, 1990 and 2019

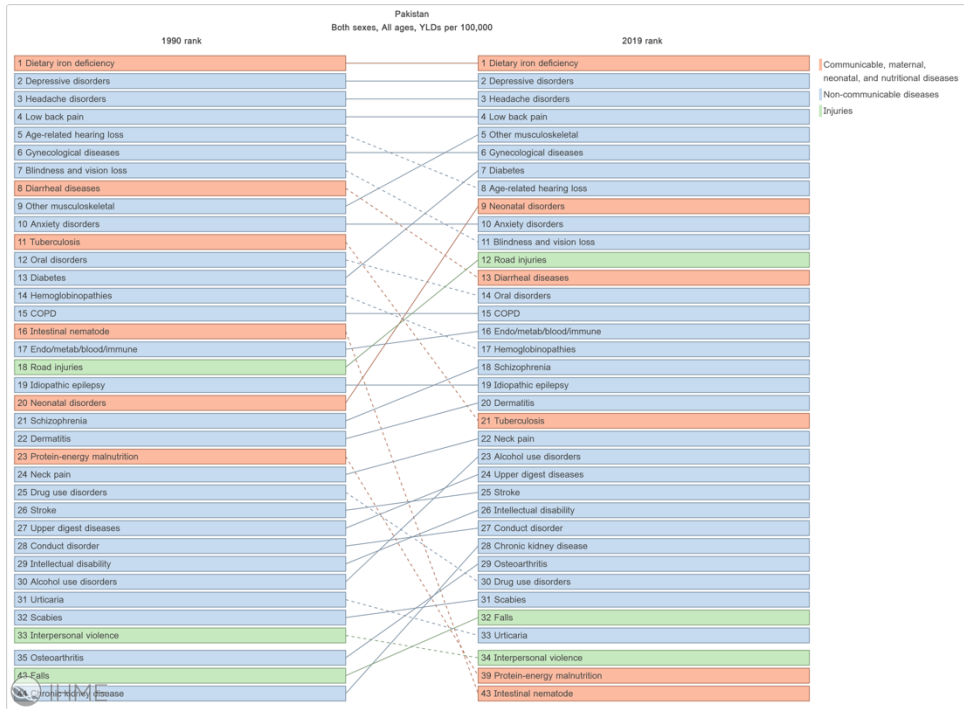

Appendix Figure 7: Number of deaths (top) and percentage of DALYs (bottom) attributable to the leading risk factors for all ages and both sexes, 1990 and 2019

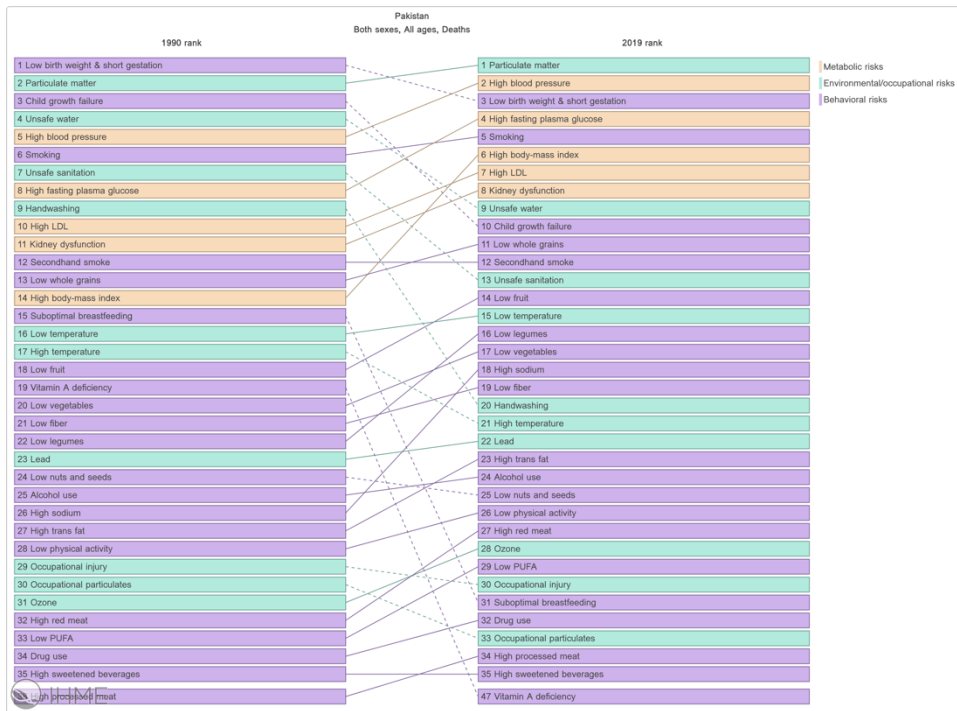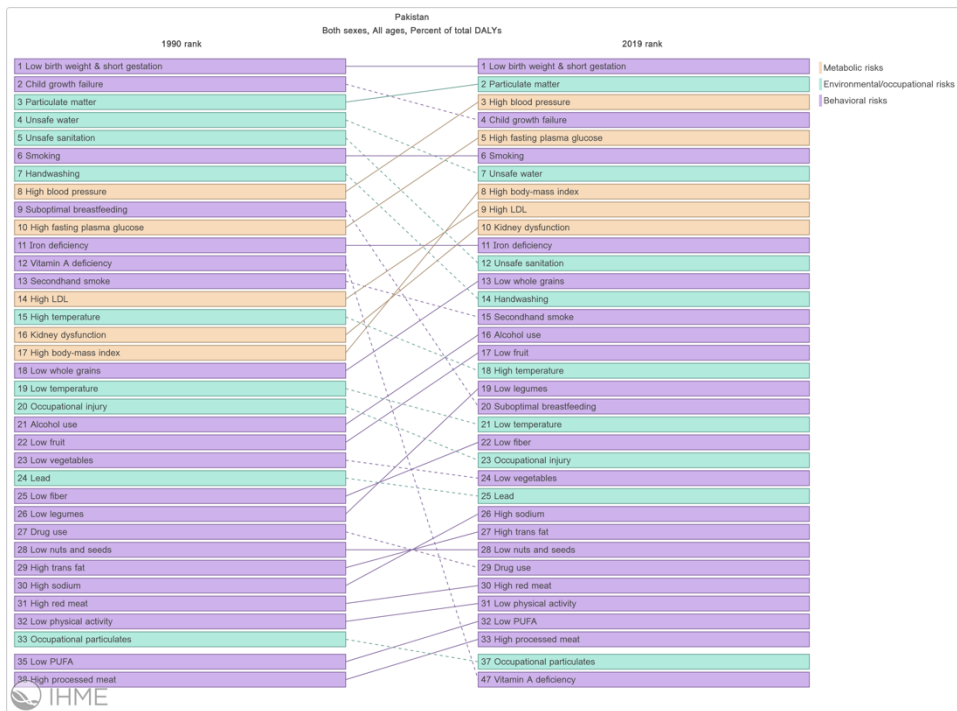

## Section 8: GATHER tables

### GATHER checklist

| Item #                                                                                                | Checklist item                                                                                                                                                                                                                                                                                                                                                                            | Reported on page #                             |
|-------------------------------------------------------------------------------------------------------|-------------------------------------------------------------------------------------------------------------------------------------------------------------------------------------------------------------------------------------------------------------------------------------------------------------------------------------------------------------------------------------------|------------------------------------------------|
| <b>Objectives and funding</b>                                                                         |                                                                                                                                                                                                                                                                                                                                                                                           |                                                |
| 1                                                                                                     | Define the indicator(s), populations (including age, sex, and geographic entities), and time period(s) for which estimates were made.                                                                                                                                                                                                                                                     | 2; 11-15                                       |
| 2                                                                                                     | List the funding sources for the work.                                                                                                                                                                                                                                                                                                                                                    | 4; 15; 28                                      |
| <b>Data Inputs</b>                                                                                    |                                                                                                                                                                                                                                                                                                                                                                                           |                                                |
| <i>For all data inputs from multiple sources that are synthesised as part of the study:</i>           |                                                                                                                                                                                                                                                                                                                                                                                           |                                                |
| 3                                                                                                     | Describe how the data were identified and how the data were accessed.                                                                                                                                                                                                                                                                                                                     | 11-15; Appendix                                |
| 4                                                                                                     | Specify the inclusion and exclusion criteria. Identify all ad-hoc exclusions.                                                                                                                                                                                                                                                                                                             | 11-15; Appendix                                |
| 5                                                                                                     | Provide information on all included data sources and their main characteristics. For each data source used, report reference information or contact name/institution, population represented, data collection method, year(s) of data collection, sex and age range, diagnostic criteria or measurement method, and sample size, as relevant.                                             | 11-15; Appendix                                |
| 6                                                                                                     | Identify and describe any categories of input data that have potentially important biases (e.g., based on characteristics listed in item 5).                                                                                                                                                                                                                                              | 11-15; Appendix                                |
| <i>For data inputs that contribute to the analysis but were not synthesised as part of the study:</i> |                                                                                                                                                                                                                                                                                                                                                                                           |                                                |
| 7                                                                                                     | Describe and give sources for any other data inputs.                                                                                                                                                                                                                                                                                                                                      | 11-15; Appendix                                |
| <i>For all data inputs:</i>                                                                           |                                                                                                                                                                                                                                                                                                                                                                                           |                                                |
| 8                                                                                                     | Provide all data inputs in a file format from which data can be efficiently extracted (e.g., a spreadsheet rather than a PDF), including all relevant meta-data listed in item 5. For any data inputs that cannot be shared because of ethical or legal reasons, such as third-party ownership, provide a contact name or the name of the institution that retains the right to the data. | Appendix; GHDx URL                             |
| <b>Data analysis</b>                                                                                  |                                                                                                                                                                                                                                                                                                                                                                                           |                                                |
| 9                                                                                                     | Provide a conceptual overview of the data analysis method. A diagram may be helpful.                                                                                                                                                                                                                                                                                                      | 11-15                                          |
| 10                                                                                                    | Provide a detailed description of all steps of the analysis, including mathematical formulae. This description should cover, as relevant, data cleaning, data pre-processing, data adjustments and weighting of data sources, and mathematical or statistical model(s).                                                                                                                   | 11-15; Appendix                                |
| 11                                                                                                    | Describe how candidate models were evaluated and how the final model(s) were selected.                                                                                                                                                                                                                                                                                                    | 11-15; Appendix                                |
| 12                                                                                                    | Provide the results of an evaluation of model performance, if done, as well as the results of any relevant sensitivity analysis.                                                                                                                                                                                                                                                          | N/A                                            |
| 13                                                                                                    | Describe methods for calculating uncertainty of the estimates. State which sources of uncertainty were, and were not, accounted for in the uncertainty analysis.                                                                                                                                                                                                                          | 14                                             |
| 14                                                                                                    | State how analytic or statistical source code used to generate estimates can be accessed.                                                                                                                                                                                                                                                                                                 | Available through GHDx link (upon publication) |

| <b>Results and Discussion</b> |                                                                                                                                                          |       |
|-------------------------------|----------------------------------------------------------------------------------------------------------------------------------------------------------|-------|
| <b>15</b>                     | Provide published estimates in a file format from which data can be efficiently extracted.                                                               | N/A   |
| <b>16</b>                     | Report a quantitative measure of the uncertainty of the estimates (e.g. uncertainty intervals).                                                          | 14    |
| <b>17</b>                     | Interpret results in light of existing evidence. If updating a previous set of estimates, describe the reasons for changes in estimates.                 | 5-7   |
| <b>18</b>                     | Discuss limitations of the estimates. Include a discussion of any modelling assumptions or data limitations that affect interpretation of the estimates. | 26-27 |
